# Supplementary material for: Long-Term Spatial Pattern Predictors (Historically Low Rainfall, Benthic Topography, and Hurricanes) of Seagrass Cover Change (1984 to 2021) in a Jamaican Marine Protected Area
Source: MDPI journal article supplement (doi:10.3390/rs16071247), 2024-03-31
Supplement: s1 [file s1]

### *Mapping hurricane exposure*

A DEM and information on windspeed and direction as the hurricane passed by Jamaica or made landfall are needed to create EV maps. The BSM of the bay was used in place of a DEM and information on windspeed and direction was obtained from actual and proxy images of the three hurricanes. These were available as processed ultra-high resolution QuikSCAT Scatterometer images of Hurricane Ivan and Dean (available at: <http://www.scp.byu.edu/data/Quikscat/HRStorms.html>) and were obtained as a .gif file and rectified to the Jamaican datum, JAD 2001. The images included the circular hurricane wind bands color-coded according to wind speed (in knots) that were overlaid with wind flags (wind direction) (Figure A4). Images of Ivan at its closest point to and after it passed Jamaica were available, but there were no images of Hurricane Ivan before, Dean before and Dean as it passed by Jamaica, and there were no images of Hurricane Gilbert, because the QuikSCAT images are only available for the period 1999–2009. As such, images of Ivan and Dean after they passed Jamaica, and a proxy processed ultra-high resolution QuikSCAT image that closely matched a satellite image of Hurricane Gilbert (Hurricane Ivan (September 11, 2004)) as it passed over Jamaica were used [36,52] (Figure A4).

Before the EV maps were generated, tracks of three hurricanes were downloaded as an ESRI point shapefile file from the National Oceanic and Atmospheric Administration (NOAA), NOAA's International Best Track Archive for Climate Stewardship (IBTrACS) website (<https://www.ncei.noaa.gov/products/international-best-track-archive>) [86,87] and re-projected to the Jamaican datum, JAD 2001. The imagery 'Georeference' function in ArcGIS Pro was used to center the image of Hurricane Dean and the proxy image of Gilbert on track point locations, which represented the approximate location of the hurricane's eye before they passed, at their closest point to and after they went passed Jamaica. The two images of Hurricane Ivan did not need to be centered, but an image of the hurricane after it passed Jamaica was centered on a point corresponding to the proximate location of the eye before it passed Jamaica (Figure A4). At each location, wind flags found close to Bluefields Bay were digitized as polylines in ArcGIS Pro and the 'Linear Directional Mean' function was used to determine wind direction from the polylines. Windspeed was estimated from the colour coded wind bands by using the upper range or value for wind speeds  $\geq 35$  knots ( $64 \text{ km hr}^{-1}$ ). There were no wind speed values  $> 50$  knots ( $93 \text{ km hr}^{-1}$ ), which were generally found closer to the track points. Windspeed was therefore estimated by averaging windspeed at the track point where the image was centered (this information was available in the attribute table of the tracks) and  $93 \text{ km hr}^{-1}$ . Maps of topographic exposure for various wind directions were generated using the 'hillshade' function/feature in ArcGIS Pro with the BSM (following [88,89]). Wind direction was used as the azimuth angle and a fixed wind inflection angle of  $20^\circ$  was used (following [52]) in the 'hillshade' function. Hillshade maps of exposure for each location and for each hurricane were generated and used in the following formula in the raster calculator in ArcGIS Pro:

$$EV = (\sum_{i=1}^n (\text{wind speed}_i * \text{hillshade map of exposure}_i)) / n, \quad (1)$$

where  $i$  is one of several locations where the actual or proxy hurricane image(s) was (were) located or centered and evaluated (e.g., location ( $i$ ) = 1, 2, 3, 4...) and  $n$  is the total number of locations evaluated/hillshade maps created.

**Table S1.** Validation criteria for finals models that included the most important predictors of the probability of submerged aquatic vegetation (SAV) loss in the Bluefields Bay Special Fish Conservation Area (BBSFCA), Westmoreland, Jamaica, for 23, 2 – 4-year periods, generated using a 5-fold cross validation of spatial Bayesian Integrated Nested Laplace Approximation (INLA) generalized linear mixed models. The validation criteria used included: mean squared error (MSE), root mean squared error (RMSE), mean absolute error (MAE), mean absolute percentage error (MAPE), bias (a measure of consistent under- or over-forecasting; BIAS), relative bias (rBIAS), and relative mean separation (rMSEP). Also included are the calculated values for the receiver operating characteristic (ROC) curve (AUC), deviance information criterion (DIC), and marginal R-squared (mR<sup>2</sup>).

| Period         | Predictors                                                  | AUC          | DIC           | mR <sup>2</sup> | MSE          | RMSE        | MAE         | MAPE          | BIAS         | rBIAS           | rMSEP       |
|----------------|-------------------------------------------------------------|--------------|---------------|-----------------|--------------|-------------|-------------|---------------|--------------|-----------------|-------------|
| 1984 -<br>1985 | aspect+ aspect <sup>2</sup>                                 | 0.817        | 517.6         | -2.1            | 31.42        | 5.60        | 5.54        | 557.26        | -5.54        | -1598.15        | 1.02        |
|                | bsm                                                         | 0.714        | 529.8         | -1.2            | 31.95        | 5.65        | 5.57        | 583.32        | -5.57        | -1602.25        | 1.04        |
|                | <b>dist+ bsm</b>                                            | <b>0.728</b> | <b>525.9</b>  | <b>-0.6</b>     | <b>31.17</b> | <b>5.58</b> | <b>5.49</b> | <b>571.58</b> | <b>-5.49</b> | <b>-1579.07</b> | <b>1.04</b> |
| 1985 -<br>1986 | <b>dir</b>                                                  | <b>0.944</b> | <b>500.3</b>  | <b>13.0</b>     | <b>69.06</b> | <b>8.30</b> | <b>8.07</b> | <b>328.81</b> | <b>-8.07</b> | <b>-1332.97</b> | <b>1.05</b> |
|                | bsm                                                         | 0.956        | 548.2         | 6.1             | 101.52       | 10.07       | 9.27        | 344.93        | -9.27        | -1532.28        | 1.20        |
|                | bsm + slope                                                 | 0.954        | 543.9         | 7.8             | 101.72       | 10.08       | 9.27        | 339.69        | -9.27        | -1532.57        | 1.20        |
| 1986 -<br>1987 | <b>dist + dir</b>                                           | <b>0.845</b> | <b>2643.5</b> | <b>13.7</b>     | <b>16.95</b> | <b>4.12</b> | <b>3.90</b> | <b>198.36</b> | <b>-3.87</b> | <b>-94.65</b>   | <b>1.12</b> |
|                | dist + bsm+ bsm <sup>2</sup> + bsm <sup>3</sup>             | 0.868        | 2986.9        | 12.0            | 36.68        | 6.05        | 5.17        | 304.15        | -5.17        | -126.16         | 1.37        |
|                | dist+ dir + aspect                                          | 0.851        | 2638.1        | 13.7            | 17.11        | 4.14        | 3.92        | 198.30        | -3.89        | -95.01          | 1.12        |
|                | dist+ aspect + slope                                        | 0.849        | 3135.3        | 10.1            | 21.88        | 4.68        | 4.29        | 321.38        | -4.29        | -105.07         | 1.17        |
|                | dist+ aspect + bsm+ bsm <sup>2</sup> + bsm <sup>3</sup>     | 0.874        | 2929.0        | 12.6            | 35.86        | 5.98        | 5.12        | 289.81        | -5.12        | -124.82         | 1.37        |
| 1987 -<br>1988 | dist                                                        | 0.712        | 127.3         | -0.2            | 45.68        | 7.35        | 7.35        | 590.37        | -7.35        | -8489.57        | 1.03        |
|                | dir                                                         | 0.764        | 132.5         | -0.2            | 48.83        | 7.56        | 7.48        | 610.01        | -7.48        | -8692.97        | 1.06        |
|                | <b>aspect</b>                                               | <b>0.725</b> | <b>134.1</b>  | <b>-0.1</b>     | <b>41.08</b> | <b>6.96</b> | <b>7.01</b> | <b>644.02</b> | <b>-7.01</b> | <b>-8176.68</b> | <b>1.01</b> |
|                | bsm                                                         | 0.817        | 122.6         | -0.3            | 54.78        | 8.07        | 7.96        | 582.33        | -7.96        | -9230.55        | 1.05        |
|                | dist + bsm                                                  | 0.866        | 109.4         | -1.1            | 84.37        | 9.86        | 9.68        | 525.11        | -9.68        | -               | 1.09        |
| 1988 -<br>1990 |                                                             |              |               |                 |              |             |             |               |              | 11219.13        |             |
|                | dist + dist <sup>2</sup>                                    | 0.877        | 893.1         | 6.5             | 39.43        | 6.28        | 6.04        | 406.04        | -6.04        | -715.33         | 1.08        |
|                | <b>dist + dist<sup>2</sup> + aspect+ aspect<sup>2</sup></b> | <b>0.879</b> | <b>889.7</b>  | <b>6.3</b>      | <b>39.47</b> | <b>6.28</b> | <b>6.04</b> | <b>402.69</b> | <b>-6.04</b> | <b>-714.91</b>  | <b>1.08</b> |
|                | dist + dist <sup>2</sup> + bsm                              | 0.898        | 825.2         | 11.5            | 50.66        | 7.11        | 6.76        | 377.87        | -6.76        | -800.35         | 1.12        |
|                | Aspect + aspect <sup>2</sup> + bsm                          | 0.889        | 888.4         | 5.9             | 46.02        | 6.78        | 6.39        | 401.55        | -6.39        | -758.92         | 1.14        |

|             |                                                                                                                  |              |               |             |               |              |              |               |               |                 |             |
|-------------|------------------------------------------------------------------------------------------------------------------|--------------|---------------|-------------|---------------|--------------|--------------|---------------|---------------|-----------------|-------------|
|             | dist + dist <sup>2</sup> + dir + bsm                                                                             | 0.901        | 819.1         | 9.3         | 48.71         | 6.98         | 6.63         | 361.86        | -6.63         | -785.33         | 1.11        |
| 1990-1993   | <b>dir + bsm + bsm<sup>2</sup> + bsm<sup>3</sup></b>                                                             | 0.760        | <b>3426.4</b> | <b>14.2</b> | <b>14.05</b>  | <b>3.75</b>  | <b>3.64</b>  | <b>339.69</b> | <b>-3.64</b>  | <b>-90.73</b>   | <b>1.06</b> |
|             | dist + dist <sup>2</sup> + dir + bsm + bsm <sup>2</sup> + bsm <sup>3</sup>                                       | 0.805        | 3355.9        | 14.3        | 15.57         | 3.95         | 3.79         | 328.55        | -3.79         | -94.59          | 1.08        |
|             | dir + aspect + bsm + bsm <sup>2</sup> + bsm <sup>3</sup>                                                         | 0.804        | 3346.3        | 14.0        | 14.77         | 3.84         | 3.71         | 333.64        | -3.71         | -92.66          | 1.06        |
|             | dir + slope + slope <sup>2</sup> + bsm + bsm <sup>2</sup> + bsm <sup>3</sup>                                     | 0.821        | 3285.7        | 14.0        | 15.37         | 3.92         | 3.78         | 323.89        | -3.78         | -94.30          | 1.07        |
|             | dist + dist <sup>2</sup> + dir + aspect + bsm + bsm <sup>2</sup> + bsm <sup>3</sup>                              | 0.832        | 3272.2        | 14.2        | 16.50         | 4.06         | 3.89         | 322.23        | -3.89         | -96.94          | 1.09        |
|             | dist + dist <sup>2</sup> + dir + slope + slope <sup>2</sup> + bsm + bsm <sup>2</sup> + bsm <sup>3</sup>          | 0.839        | 3244.5        | 14.4        | 16.71         | 4.09         | 3.91         | 317.46        | -3.91         | -97.60          | 1.09        |
|             | dir + aspect + slope + slope <sup>2</sup> + bsm + bsm <sup>2</sup> + bsm <sup>3</sup>                            | 0.844        | 3213.9        | 14.2        | 16.04         | 4.01         | 3.85         | 318.13        | -3.85         | -96.03          | 1.08        |
|             | dist + dist <sup>2</sup> + dir + aspect + slope + slope <sup>2</sup> + bsm + bsm <sup>2</sup> + bsm <sup>3</sup> | 0.856        | 3170.7        | 14.7        | 17.55         | 4.19         | 3.99         | 311.65        | -3.99         | -99.65          | 1.10        |
| 1993-1994   | dir                                                                                                              | 0.980        | 532.9         | -36.9       | 547.31        | 22.59        | 21.55        | 149.50        | -21.43        | -1925.46        | 1.11        |
|             | <b>bsm + bsm<sup>2</sup> + bsm<sup>3</sup></b>                                                                   | <b>0.947</b> | <b>922.3</b>  | <b>9.8</b>  | <b>135.69</b> | <b>11.49</b> | <b>10.43</b> | <b>324.67</b> | <b>-10.43</b> | <b>-907.19</b>  | <b>1.23</b> |
|             | dir + bsm + bsm <sup>2</sup> + bsm <sup>3</sup>                                                                  | 0.987        | 563.5         | 38.6        | 254.53        | 15.88        | 15.01        | 174.60        | -15.01        | -1362.07        | 1.13        |
|             | dist + dir + bsm + bsm <sup>2</sup> + bsm <sup>3</sup>                                                           | 0.987        | 561.3         | 35.5        | 196.68        | 14.02        | 13.24        | 108.99        | -13.24        | -1095.90        | 1.14        |
|             | dist + aspect + aspect <sup>2</sup> + bsm + bsm <sup>2</sup> + bsm <sup>3</sup>                                  | 0.945        | 856.2         | 12.0        | 142.57        | 11.94        | 10.82        | 271.46        | -10.82        | -895.76         | 1.23        |
| 1994 - 1995 | dist                                                                                                             | 0.975        | 396.7         | 5.8         | 453.76        | 21.28        | 18.21        | 341.71        | -18.21        | -3540.77        | 1.34        |
|             | <b>dir + dir<sup>2</sup></b>                                                                                     | <b>0.907</b> | <b>511.6</b>  | <b>2.1</b>  | <b>35.73</b>  | <b>5.97</b>  | <b>5.90</b>  | <b>417.45</b> | <b>-5.90</b>  | <b>-1270.88</b> | <b>1.02</b> |
|             | dir + dir <sup>2</sup> + aspect + aspect <sup>2</sup>                                                            | 0.922        | 490.4         | 4.7         | 41.65         | 6.45         | 6.33         | 425.66        | -6.33         | -1361.70        | 1.04        |
| 1995 - 1996 | dist                                                                                                             | 0.680        | 1353.9        | 0.2         | 18.59         | 4.31         | 4.28         | 505.79        | -4.28         | -399.54         | 1.01        |
|             | dir                                                                                                              | 0.724        | 1195.6        | 3.0         | 22.83         | 4.78         | 4.70         | 441.00        | -4.70         | -443.05         | 1.03        |
|             | <b>aspect + aspect<sup>2</sup> + aspect<sup>3</sup> + aspect<sup>4</sup></b>                                     | <b>0.673</b> | <b>1331.6</b> | <b>-1.3</b> | <b>18.42</b>  | <b>4.28</b>  | <b>4.23</b>  | <b>484.96</b> | <b>-4.23</b>  | <b>-397.36</b>  | <b>1.02</b> |
|             | dist + aspect + aspect <sup>2</sup> + aspect <sup>3</sup> + aspect <sup>4</sup> + slope                          | 0.680        | 1333.8        | -0.9        | 18.72         | 4.32         | 4.26         | 483.93        | -4.26         | -430.92         | 1.03        |
|             | dir + aspect + aspect <sup>2</sup> + aspect <sup>3</sup> + aspect <sup>4</sup>                                   | 0.751        | 1192.6        | 2.3         | 22.58         | 4.75         | 4.66         | 428.18        | -4.66         | -439.21         | 1.03        |
| 1996 - 1997 | dist                                                                                                             | 0.886        | 239.3         | -1.1        | 86.7          | 9.3          | 8.7          | 573.6         | -8.7          | -5281.8         | 1.1         |
|             | dir                                                                                                              | 0.990        | 149.1         | -6.0        | 260.64        | 16.13        | 15.64        | 325.79        | -15.64        | -8601.72        | 1.06        |

|             |                                                                                                                                                                              |               |               |             |              |              |              |                |               |                 |              |
|-------------|------------------------------------------------------------------------------------------------------------------------------------------------------------------------------|---------------|---------------|-------------|--------------|--------------|--------------|----------------|---------------|-----------------|--------------|
|             | <i>aspect</i>                                                                                                                                                                | <b>0.637</b>  | <b>281.9</b>  | <b>-0.2</b> | <b>35.44</b> | <b>5.95</b>  | <b>5.94</b>  | <b>679.23</b>  | <b>-5.94</b>  | <b>-3721.99</b> | <b>1.00</b>  |
|             | dist + slope                                                                                                                                                                 | 0.915         | 237.8         | -0.4        | 102.42       | 10.11        | 9.34         | 558.21         | -9.34         | -5832.06        | 1.16         |
|             | aspect + slope                                                                                                                                                               | 0.738         | 239.3         | -1.1        | 86.7         | 9.3          | 8.7          | 573.6          | -8.7          | -5281.8         | 1.1          |
| 1997 – 1999 | <i>dir</i>                                                                                                                                                                   | <b>0.713</b>  | <b>907.5</b>  | <b>3.6</b>  | <b>27.59</b> | <b>5.25</b>  | <b>5.18</b>  | <b>488.98</b>  | <b>-5.18</b>  | <b>-731.55</b>  | <b>1.03</b>  |
|             | dist + dir                                                                                                                                                                   | 0.743         | 895.0         | 3.0         | 29.42        | 5.42         | 5.29         | 474.80         | -5.29         | -738.02         | 1.04         |
|             | dist + bsm                                                                                                                                                                   | 0.880         | 839.0         | 2.7         | 41.85        | 6.47         | 6.14         | 424.68         | -6.14         | -858.44         | 1.12         |
|             | dist + aspect + bsm                                                                                                                                                          | 0.883         | 831.8         | 1.0         | 40.50        | 6.36         | 6.03         | 406.05         | -6.03         | -841.72         | 1.12         |
|             | aspect + bsm + slope                                                                                                                                                         | 0.878         | 846.4         | 1.0         | 40.13        | 6.33         | 6.00         | 408.66         | -6.00         | -839.98         | 1.13         |
| 1999 - 2000 | dist                                                                                                                                                                         | 0.856         | 1650.9        | 4.9         | 35.63        | 5.96         | 5.50         | 395.56         | -5.50         | -316.53         | 1.16         |
|             | dir                                                                                                                                                                          | 0.842         | 1405.0        | 12.8        | 27.25        | 5.22         | 5.07         | 323.70         | -5.07         | -292.04         | 1.05         |
|             | <b>bsm + bsm<sup>2</sup></b>                                                                                                                                                 | <b>0.832</b>  | <b>1641.4</b> | <b>6.8</b>  | <b>25.04</b> | <b>5.00</b>  | <b>4.82</b>  | <b>392.83</b>  | <b>-4.82</b>  | <b>-277.13</b>  | <b>1.09</b>  |
|             | dist + dir                                                                                                                                                                   | 0.887         | 1387.6        | 13.4        | 31.91        | 5.65         | 5.45         | 329.09         | -5.45         | -313.34         | 1.07         |
|             | dist + aspect                                                                                                                                                                | 0.862         | 1638.3        | 4.7         | 34.99        | 5.91         | 5.46         | 386.83         | -5.46         | -313.74         | 1.16         |
| 2000 - 2002 | dist+ dist <sup>2</sup> + dist <sup>3</sup> + dist <sup>4</sup> + dir                                                                                                        | 0.9190        | 1312.6        | 8.9         | 70.37        | 8.39         | 7.74         | 356.47         | -7.74         | -440.45         | 1.18         |
|             | dist+ dist <sup>2</sup> + dist <sup>3</sup> + dist <sup>4</sup> + aspect                                                                                                     | 0.8843        | 1442.2        | 6.5         | 51.04        | 7.14         | 6.54         | 390.41         | -6.54         | -372.90         | 1.20         |
|             | dist+ dist <sup>2</sup> + dist <sup>3</sup> + dist <sup>4</sup> + bsm + bsm <sup>2</sup> + bsm <sup>3</sup>                                                                  | 0.9315        | 1233.0        | 13.1        | 60.73        | 7.79         | 7.20         | 320.41         | -7.20         | -410.38         | 1.19         |
|             | dist+ dist <sup>2</sup> + dist <sup>3</sup> + dist <sup>4</sup> + aspect + bsm + bsm <sup>2</sup> + bsm <sup>3</sup>                                                         | 0.9345        | 1221.2        | 13.6        | 60.78        | 7.80         | 7.21         | 319.77         | -7.21         | -411.30         | 1.18         |
|             | <b>aspect + bsm + bsm<sup>2</sup> + bsm<sup>3</sup></b>                                                                                                                      | <b>0.7614</b> | <b>1677.3</b> | <b>2.8</b>  | <b>22.92</b> | <b>4.79</b>  | <b>4.66</b>  | <b>455.95</b>  | <b>-4.66</b>  | <b>-265.14</b>  | <b>1.06</b>  |
| 2002 - 2006 | <b>dir + dir<sup>2</sup> + dir<sup>3</sup> + aspect + aspect<sup>2</sup> + aspect<sup>3</sup></b>                                                                            | <b>0.708</b>  | <b>5685.3</b> | <b>15.8</b> | <b>7.737</b> | <b>2.781</b> | <b>2.656</b> | <b>261.240</b> | <b>-2.655</b> | <b>-28.643</b>  | <b>1.091</b> |
|             | dist + dir + dir <sup>2</sup> + dir <sup>3</sup> + aspect + aspect <sup>2</sup> + aspect <sup>3</sup>                                                                        | 0.760         | 5556.9        | 16.8        | 8.178        | 2.859        | 2.706        | 249.316        | -2.699        | -29.110         | 1.134        |
|             | dist + dir + dir <sup>2</sup> + dir <sup>3</sup> + bsm + bsm <sup>2</sup>                                                                                                    | 0.775         | 5530.9        | 15.4        | 8.184        | 2.858        | 2.687        | 240.470        | -2.680        | -29.110         | 1.191        |
|             | dir + dir <sup>2</sup> + dir <sup>3</sup> + aspect + aspect <sup>2</sup> + aspect <sup>3</sup> + bsm + bsm <sup>2</sup>                                                      | 0.731         | 5600.6        | 16.7        | 8.163        | 2.857        | 2.720        | 257.870        | -2.717        | -29.276         | 1.125        |
|             | dist + dir + dir <sup>2</sup> + dir <sup>3</sup> + aspect + aspect <sup>2</sup> + aspect <sup>3</sup> + slope + slope <sup>2</sup> + slope <sup>3</sup> + slope <sup>4</sup> | 0.794         | 5382.8        | 15.4        | 7.963        | 2.822        | 2.616        | 208.265        | -2.581        | -26.916         | 1.219        |
| 2006 - 2008 | <i>dist</i>                                                                                                                                                                  | <b>0.817</b>  | <b>3837.8</b> | <b>9.1</b>  | <b>16.28</b> | <b>4.03</b>  | <b>3.72</b>  | <b>317.68</b>  | <b>-3.72</b>  | <b>-70.35</b>   | <b>1.15</b>  |

|                |                                                                                                   |              |               |             |              |             |             |               |              |                 |             |
|----------------|---------------------------------------------------------------------------------------------------|--------------|---------------|-------------|--------------|-------------|-------------|---------------|--------------|-----------------|-------------|
|                | dist+ dist <sup>2</sup> + dist <sup>3</sup> + dist <sup>4</sup> + bsm + bsm <sup>2</sup>          | 0.867        | 3132.9        | 13.2        | 65.93        | 8.12        | 6.24        | 193.45        | -6.24        | -119.04         | 1.70        |
|                | dir + bsm + bsm <sup>2</sup>                                                                      | 0.839        | 3640.7        | 8.5         | 50.17        | 7.08        | 5.44        | 283.38        | -5.44        | -102.94         | 1.72        |
|                | dist+ dist <sup>2</sup> + dist <sup>3</sup> + dist <sup>4</sup> + dir + bsm + bsm <sup>2</sup>    | 0.876        | 3106.5        | 16.7        | 65.17        | 8.07        | 6.29        | 211.45        | -6.29        | -115.90         | 1.65        |
|                | dist+ dist <sup>2</sup> + dist <sup>3</sup> + dist <sup>4</sup> + bsm + bsm <sup>2</sup> + Dean   | 0.846        | 4499.5        | -391.4      | 0.05         | 0.23        | 0.07        | 98.06         | -0.06        | -1.06           | 0.96        |
| 2008 -<br>2010 | <b><i>dir + dir<sup>2</sup></i></b>                                                               | <b>0.846</b> | <b>2050.8</b> | <b>19.2</b> | <b>19.21</b> | <b>4.38</b> | <b>4.30</b> | <b>334.31</b> | <b>-4.30</b> | <b>-166.52</b>  | <b>1.04</b> |
|                | dist + dir + dir <sup>2</sup>                                                                     | 0.867        | 1978.9        | 19.2        | 24.46        | 4.95        | 4.74        | 321.83        | -4.74        | -183.64         | 1.08        |
|                | dir + dir <sup>2</sup> + bsm + bsm <sup>2</sup>                                                   | 0.874        | 1913.3        | 18.5        | 21.18        | 4.60        | 4.47        | 291.21        | -4.46        | -172.81         | 1.07        |
|                | dist + dir + dir <sup>2</sup> + bsm + bsm <sup>2</sup>                                            | 0.874        | 1892.9        | 19.7        | 23.19        | 4.82        | 4.65        | 296.32        | -4.65        | -180.17         | 1.07        |
|                | dist + dir + dir <sup>2</sup> + Ivan                                                              | 0.864        | 1986.4        | 18.9        | 23.62        | 4.86        | 4.63        | 298.37        | -4.63        | -181.65         | 1.03        |
|                | dir + dir <sup>2</sup> + bsm + bsm <sup>2</sup> + Ivan                                            | 0.878        | 1909.8        | 18.0        | 21.01        | 4.58        | 4.44        | 283.74        | -4.44        | -169.50         | 1.04        |
|                | dist + dir + dir <sup>2</sup> + bsm + bsm <sup>2</sup> + Avg                                      | 0.874        | 1890.7        | 20.1        | 23.49        | 4.85        | 4.68        | 298.99        | -4.68        | -181.38         | 1.05        |
| 2010 -<br>2013 | dist+ dist <sup>2</sup> + dist <sup>3</sup> + dist <sup>4</sup> + slope + slope <sup>2</sup>      | 0.691        | 3576.6        | 1.5         | 12.65        | 3.56        | 3.34        | 365.99        | -3.34        | -84.71          | 1.14        |
|                | <b><i>dist+ dist<sup>2</sup> + dist<sup>3</sup> + dist<sup>4</sup> + Avg</i></b>                  | <b>0.673</b> | <b>3609.9</b> | <b>1.5</b>  | <b>11.85</b> | <b>3.44</b> | <b>3.26</b> | <b>368.13</b> | <b>-3.26</b> | <b>-82.12</b>   | <b>1.07</b> |
|                | dist+ dist <sup>2</sup> + dist <sup>3</sup> + dist <sup>4</sup> + aspect + slope                  | 0.699        | 3625.3        | 1.5         | 11.90        | 3.45        | 3.27        | 360.75        | -3.27        | -81.28          | 1.12        |
|                | dist+ dist <sup>2</sup> + dist <sup>3</sup> + dist <sup>4</sup> + aspect + Ivan                   | 0.661        | 3628.4        | 1.5         | 12.36        | 3.52        | 3.27        | 363.49        | -3.27        | -87.62          | 1.11        |
|                | dist+ dist <sup>2</sup> + dist <sup>3</sup> + dist <sup>4</sup> + Dean                            | 0.673        | 3614.7        | 1.5         | 12.19        | 3.49        | 3.30        | 371.69        | -3.30        | -83.19          | 1.10        |
| 2013 -<br>2015 | <b><i>dist+ dist<sup>2</sup> + dist<sup>3</sup></i></b>                                           | <b>0.935</b> | <b>305.9</b>  | <b>9.8</b>  | <b>71.77</b> | <b>8.46</b> | <b>8.20</b> | <b>379.33</b> | <b>-8.20</b> | <b>-2875.17</b> | <b>1.07</b> |
|                | bsm                                                                                               | 0.962        | 284.6         | 7.9         | 187.64       | 13.57       | 12.49       | 392.63        | -12.49       | -4252.76        | 1.20        |
|                | aspect + aspect <sup>2</sup> + bsm                                                                | 0.960        | 282.6         | 11.2        | 185.93       | 13.51       | 12.47       | 393.98        | -12.47       | -4244.73        | 1.19        |
|                | dist+ dist <sup>2</sup> + dist <sup>3</sup> + bsm                                                 | 0.968        | 239.9         | 24.9        | 191.96       | 13.69       | 12.86       | 336.27        | -12.86       | -4385.65        | 1.15        |
|                | dir + aspect + aspect <sup>2</sup> + bsm                                                          | 0.962        | 285.9         | 5.0         | 137.47       | 11.70       | 10.90       | 309.02        | -10.90       | -3807.03        | 1.17        |
| 2015 -<br>2016 | <b><i>dir</i></b>                                                                                 | <b>0.728</b> | <b>3945.4</b> | <b>6.5</b>  | <b>10.49</b> | <b>3.24</b> | <b>3.17</b> | <b>344.72</b> | <b>-3.17</b> | <b>-65.88</b>   | <b>1.04</b> |
|                | dir + bsm                                                                                         | 0.724        | 3924.9        | 6.7         | 11.09        | 3.33        | 3.24        | 344.40        | -3.24        | -67.32          | 1.04        |
|                | dist+ dist <sup>2</sup> + dist <sup>3</sup> + dir + bsm                                           | 0.736        | 3897.6        | 7.0         | 10.98        | 3.31        | 3.22        | 337.42        | -3.22        | -66.88          | 1.05        |
|                | dir + bsm + slope + slope <sup>2</sup>                                                            | 0.745        | 3870.5        | 6.6         | 11.09        | 3.33        | 3.22        | 330.85        | -3.22        | -66.94          | 1.06        |
|                | <b><i>dist+ dist<sup>2</sup> + dist<sup>3</sup> + dir + aspect + aspect<sup>2</sup> + bsm</i></b> | <b>0.740</b> | <b>3889.7</b> | <b>6.7</b>  | <b>10.66</b> | <b>3.26</b> | <b>3.16</b> | <b>329.58</b> | <b>-3.16</b> | <b>-65.72</b>   | <b>1.05</b> |
| 2016 -<br>2017 | bsm + bsm <sup>2</sup>                                                                            | 0.743        | 1142.2        | 1.9         | 23.302       | 4.826       | 4.747       | 457.111       | -4.747       | -465.102        | 1.046       |

|                |                                                                                                                                                                    |              |               |             |               |              |              |                |               |                             |              |
|----------------|--------------------------------------------------------------------------------------------------------------------------------------------------------------------|--------------|---------------|-------------|---------------|--------------|--------------|----------------|---------------|-----------------------------|--------------|
|                | dist + dir                                                                                                                                                         | 0.789        | 1174.7        | 2.1         | 28.554        | 5.343        | 5.137        | 484.099        | -5.137        | -503.440                    | 1.067        |
|                | <b>dist + bsm + bsm<sup>2</sup></b>                                                                                                                                | <b>0.801</b> | <b>1107.2</b> | <b>2.4</b>  | <b>25.811</b> | <b>5.080</b> | <b>4.944</b> | <b>437.092</b> | <b>-4.944</b> | <b>-484.426</b>             | <b>1.055</b> |
|                | dist + dir + bsm + bsm <sup>2</sup>                                                                                                                                | 0.775        | 1103.7        | 5.4         | 27.931        | 5.285        | 5.139        | 449.426        | -5.139        | -503.842                    | 1.056        |
|                | dist + dir + slope                                                                                                                                                 | 0.788        | 1175.7        | 2.1         | 27.984        | 5.288        | 5.092        | 477.800        | -5.092        | -499.277                    | 1.065        |
| 2017 -<br>2019 | slope + slope <sup>2</sup> + slope <sup>3</sup> + slope <sup>4</sup>                                                                                               | 0.669        | 603.8         | -1393.5     | 9.17          | 2.17         | 2.08         | 283.08         | -2.06         | -504.19                     | 1.05         |
|                | dir + slope + slope <sup>2</sup> + slope <sup>3</sup> + slope <sup>4</sup>                                                                                         | 0.739        | 2410.4        | -3915.2     | 4.68          | 1.16         | 1.12         | 190.75         | -1.12         | -311.60                     | 1.02         |
|                | aspect + aspect <sup>2</sup> + slope + slope <sup>2</sup> + slope <sup>3</sup> + slope <sup>4</sup> + bsm + bsm <sup>2</sup> + bsm <sup>3</sup> + bsm <sup>4</sup> | 0.724        | 550.9         | 2.6         | 36.35         | 6.02         | 5.95         | 576.60         | -5.95         | -1242.79                    | 1.03         |
|                |                                                                                                                                                                    |              |               |             |               |              |              |                |               |                             |              |
| 2019 -<br>2020 | <b>dir</b>                                                                                                                                                         | <b>0.778</b> | <b>116.9</b>  | <b>0.2</b>  | <b>49.96</b>  | <b>7.07</b>  | <b>7.05</b>  | <b>779.01</b>  | <b>-7.05</b>  | <b>-</b><br><b>13222.51</b> | <b>1.01</b>  |
|                | bsm                                                                                                                                                                | 0.900        | 103.2         | 0.3         | 82.44         | 9.07         | 8.78         | 1024.29        | -8.78         | -                           | 1.07         |
|                | dir + aspect + aspect <sup>2</sup>                                                                                                                                 | 0.751        | 112.2         | -0.3        | 72.43         | 8.49         | 8.29         | 833.84         | -8.29         | -                           | 1.04         |
|                |                                                                                                                                                                    |              |               |             |               |              |              |                |               | 15041.75                    |              |
| 2020 -<br>2021 | dir                                                                                                                                                                | 0.770        | 2022.4        | 19.3        | 21.658        | 4.654        | 4.522        | 318.179        | -4.522        | -170.827                    | 1.057        |
|                | dir + aspect                                                                                                                                                       | 0.771        | 2018.8        | 19.4        | 21.734        | 4.662        | 4.528        | 316.885        | -4.528        | -171.061                    | 1.058        |
|                | <b>dir + slope</b>                                                                                                                                                 | <b>0.773</b> | <b>2018.8</b> | <b>19.2</b> | <b>21.512</b> | <b>4.638</b> | <b>4.501</b> | <b>312.531</b> | <b>-4.501</b> | <b>-170.047</b>             | <b>1.060</b> |
|                | dist+ dist <sup>2</sup> + dist <sup>3</sup> + bsm                                                                                                                  | 0.937        | 1769.6        | 18.5        | 102.702       | 10.121       | 8.667        | 251.874        | -8.665        | -325.583                    | 1.371        |
|                | dir + aspect + slope                                                                                                                                               | 0.774        | 2015.5        | 19.3        | 21.649        | 4.653        | 4.515        | 312.464        | -4.514        | -170.563                    | 1.061        |

dir = direction from river mouth; dis = distance from river mouth; bsm = bathymetric surface model (depth); Ivan = exposure vulnerability (EV) for Hurricane Ivan; Dean = EV for Hurricane Dean; Avg. = average EV for Ivan and Dean.

**Table S2.** Validation criteria for finals models that included the most important predictors of the probability of submerged aquatic vegetation (SAV) gain in the Bluefields Bay Special Fish Conservation Area (BBSFCA), Westmoreland, Jamaica, for 23, 2 – 4-year periods, generated using a 5-fold cross validation of spatial Bayesian Integrated Nested Laplace Approximation (INLA) generalized linear mixed models. The validation criteria used included: mean squared error (MSE), root mean squared error (RMSE), mean absolute error (MAE), mean absolute percentage error (MAPE), bias (a measure of consistent under- or over-forecasting; BIAS), relative bias (rBIAS), and relative mean separation (rMSEP). Also included are the calculated values for the receiver operating characteristic (ROC) curve (AUC), deviance information criterion (DIC), and marginal R-squared ( $mR^2$ ).

| Period         | Predictors                                                                                                                        | AUC          | DIC           | $mR^2$      | MSE          | RMSE        | MAE         | MAPE          | BIAS         | rBIAS          | rMSEP       |
|----------------|-----------------------------------------------------------------------------------------------------------------------------------|--------------|---------------|-------------|--------------|-------------|-------------|---------------|--------------|----------------|-------------|
| 1984 -<br>1985 | dir                                                                                                                               | 0.716        | 2086.9        | 8.9         | 18.27        | 4.27        | 4.19        | 384.44        | -4.19        | -182.56        | 1.04        |
|                | bsm + bsm <sup>2</sup>                                                                                                            | 0.829        | 1996.3        | 8.5         | 19.68        | 4.44        | 4.31        | 354.77        | -4.31        | -187.83        | 1.08        |
|                | dist + bsm + bsm <sup>2</sup>                                                                                                     | 0.817        | 1985.8        | 9.0         | 19.91        | 4.46        | 4.33        | 353.47        | -4.33        | -188.83        | 1.08        |
|                | dir + slope + slope <sup>2</sup> + slope <sup>3</sup> + slope <sup>4</sup>                                                        | 0.723        | 2088.5        | 8.8         | 19.02        | 4.36        | 4.13        | 374.38        | -4.13        | -184.16        | 1.10        |
|                | <b>dist + slope + slope<sup>2</sup> + slope<sup>3</sup> + slope<sup>4</sup> + bsm + bsm<sup>2</sup></b>                           | <b>0.819</b> | <b>2001.5</b> | <b>7.8</b>  | <b>16.82</b> | <b>3.69</b> | <b>3.39</b> | <b>290.45</b> | <b>-3.39</b> | <b>-151.26</b> | <b>1.15</b> |
| 1985 -<br>1986 | dist                                                                                                                              | 0.724        | 787.8         | 0.4         | 27.23        | 5.22        | 5.14        | 550.06        | -5.14        | -886.39        | 1.02        |
|                | <b>aspect</b>                                                                                                                     | <b>0.675</b> | <b>760.4</b>  | <b>0.3</b>  | <b>24.80</b> | <b>4.98</b> | <b>4.93</b> | <b>511.95</b> | <b>-4.93</b> | <b>-804.13</b> | <b>1.02</b> |
|                | dist + aspect                                                                                                                     | 0.761        | 758.1         | 0.6         | 28.71        | 5.36        | 5.26        | 522.95        | -5.26        | -907.86        | 1.03        |
|                | dist + bsm                                                                                                                        | 0.782        | 754.8         | 0.1         | 29.91        | 5.47        | 5.35        | 520.65        | -5.35        | -924.86        | 1.05        |
|                | dist + slope + slope <sup>2</sup>                                                                                                 | 0.732        | 787.0         | 0.4         | 27.38        | 5.23        | 5.14        | 552.42        | -5.14        | -916.55        | 1.03        |
| 1986 -<br>1987 | ns                                                                                                                                |              |               |             |              |             |             |               |              |                |             |
| 1987 -<br>1988 | <b>dir + bsm + bsm<sup>2</sup> + bsm<sup>3</sup></b>                                                                              | <b>0.898</b> | <b>2395.5</b> | <b>25.7</b> | <b>25.95</b> | <b>5.09</b> | <b>4.74</b> | <b>227.63</b> | <b>-4.73</b> | <b>-117.92</b> | <b>1.16</b> |
|                | dist + dir + bsm + bsm <sup>2</sup> + bsm <sup>3</sup>                                                                            | 0.889        | 2392.1        | 28.3        | 27.70        | 5.26        | 4.90        | 238.63        | -4.90        | -123.11        | 1.15        |
|                | dir + aspect + aspect <sup>2</sup> + aspect <sup>3</sup> + aspect <sup>4</sup> + bsm + bsm <sup>2</sup> + bsm <sup>3</sup>        | 0.914        | 2316.4        | 29.7        | 28.59        | 5.35        | 4.97        | 233.26        | -4.97        | -123.74        | 1.16        |
|                | dist + dir + aspect + aspect <sup>2</sup> + aspect <sup>3</sup> + aspect <sup>4</sup> + bsm + bsm <sup>2</sup> + bsm <sup>3</sup> | 0.907        | 2325.4        | 29.5        | 29.49        | 5.43        | 5.05        | 232.80        | -5.04        | -125.60        | 1.16        |
|                | dir + aspect + aspect <sup>2</sup> + aspect <sup>3</sup> + aspect <sup>4</sup> + Gilbert                                          | 0.843        | 2516.4        | -7.0        | 17.32        | 4.16        | 3.92        | 178.78        | -3.80        | -95.51         | 1.09        |
| 1988 -<br>1990 | dir                                                                                                                               | 0.833        | 614.4         | 5.7         | 38.47        | 6.20        | 6.09        | 434.01        | -6.09        | -1104.39       | 1.04        |

|                |                                                                                                            |              |               |             |              |             |             |               |              |                 |             |
|----------------|------------------------------------------------------------------------------------------------------------|--------------|---------------|-------------|--------------|-------------|-------------|---------------|--------------|-----------------|-------------|
|                | <i>dir + slope</i>                                                                                         | <b>0.861</b> | <b>595.4</b>  | <b>4.1</b>  | <b>38.41</b> | <b>6.20</b> | <b>6.08</b> | <b>433.51</b> | <b>-6.08</b> | <b>-963.42</b>  | <b>1.04</b> |
|                | dist + dir + slope                                                                                         | 0.877        | 566.6         | 4.3         | 41.37        | 6.43        | 6.29        | 425.70        | -6.29        | -769.67         | 1.05        |
| 1990 -<br>1993 | dist+ dist <sup>2</sup> + dist <sup>3</sup> + bsm + bsm <sup>2</sup> + bsm <sup>3</sup> + bsm <sup>4</sup> | 0.933        | 930.2         | 16.8        | 68.14        | 8.25        | 7.77        | 315.45        | -7.77        | -555.03         | 1.14        |
|                | dist + dir                                                                                                 | 0.915        | 896.0         | 18.9        | 46.83        | 6.84        | 6.65        | 278.06        | -6.65        | -474.76         | 1.06        |
|                | dir + aspect                                                                                               | 0.920        | 894.6         | 19.2        | 47.32        | 6.88        | 6.69        | 277.98        | -6.69        | -477.46         | 1.05        |
|                | <i>dir + bsm</i>                                                                                           | <b>0.932</b> | <b>846.4</b>  | <b>18.3</b> | <b>46.41</b> | <b>6.81</b> | <b>6.61</b> | <b>267.96</b> | <b>-6.61</b> | <b>-472.02</b>  | <b>1.07</b> |
|                | dist + dir + aspect                                                                                        | 0.916        | 894.0         | 19.5        | 46.88        | 6.85        | 6.65        | 275.14        | -6.65        | -474.77         | 1.06        |
| 1993-<br>1994  | dist+ dist <sup>2</sup> + dir + dir <sup>2</sup> + dir <sup>3</sup>                                        | 0.781        | 3214.9        | 11.7        | 14.99        | 3.87        | 3.71        | 326.23        | -3.71        | -90.98          | 1.09        |
|                | <i>dir + dir<sup>2</sup> + dir<sup>3</sup> + bsm</i>                                                       | <b>0.698</b> | <b>3434.9</b> | <b>6.8</b>  | <b>11.79</b> | <b>3.43</b> | <b>3.35</b> | <b>346.18</b> | <b>-3.35</b> | <b>-82.09</b>   | <b>1.05</b> |
|                | dist+ dist <sup>2</sup> + dir + dir <sup>2</sup> + dir <sup>3</sup> + aspect                               | 0.814        | 3160.4        | 10.6        | 15.24        | 3.90        | 3.73        | 312.81        | -3.73        | -91.27          | 1.10        |
|                | dist+ dist <sup>2</sup> + dir + dir <sup>2</sup> + dir <sup>3</sup> + bsm                                  | 0.811        | 3154.1        | 12.0        | 15.16        | 3.89        | 3.70        | 307.05        | -3.70        | -90.74          | 1.10        |
|                | dist+ dist <sup>2</sup> + dir + dir <sup>2</sup> + dir <sup>3</sup> + aspect + bsm                         | 0.830        | 3101.1        | 10.6        | 15.36        | 3.92        | 3.70        | 290.69        | -3.70        | -90.54          | 1.12        |
| 1994 -<br>1995 | dist                                                                                                       | 0.803        | 632.5         | 0.5         | 36.54        | 6.04        | 5.82        | 537.54        | -5.82        | -1334.13        | 1.07        |
|                | dir + dir <sup>2</sup> + dir <sup>3</sup>                                                                  | 0.836        | 698.1         | -5064.5     | 0.00         | 0.07        | 0.01        | 98.81         | 0.00         | -0.88           | 0.98        |
|                | <i>aspect</i>                                                                                              | <b>0.608</b> | <b>674.1</b>  | <b>-0.2</b> | <b>26.34</b> | <b>5.13</b> | <b>5.09</b> | <b>570.57</b> | <b>-5.09</b> | <b>-1165.06</b> | <b>1.01</b> |
|                | dist + aspect                                                                                              | 0.803        | 623.5         | 0.7         | 37.33        | 6.10        | 5.90        | 534.18        | -5.90        | -1355.01        | 1.06        |
|                | dist + bsm                                                                                                 | 0.843        | 601.9         | 0.9         | 40.80        | 6.39        | 6.17        | 513.78        | -6.17        | -1412.19        | 1.07        |
| 1995 -<br>1996 | dist                                                                                                       | 0.863        | 701.6         | 0.5         | 59.52        | 7.71        | 7.12        | 459.66        | -7.12        | -1165.03        | 1.16        |
|                | <i>aspect</i>                                                                                              | <b>0.661</b> | <b>811.2</b>  | <b>0.1</b>  | <b>25.65</b> | <b>5.06</b> | <b>5.01</b> | <b>545.40</b> | <b>-5.01</b> | <b>-821.97</b>  | <b>1.02</b> |
|                | bsm                                                                                                        | 0.901        | 650.2         | 3.7         | 57.19        | 7.56        | 7.11        | 430.66        | -7.11        | -1166.18        | 1.15        |
| 1996 -<br>1997 | dist                                                                                                       | 0.737        | 1602.9        | 1.5         | 19.34        | 4.40        | 4.32        | 478.60        | -4.32        | -307.35         | 1.03        |
|                | dir                                                                                                        | 0.796        | 1336.8        | 7.3         | 24.33        | 4.93        | 4.83        | 387.00        | -4.83        | -343.86         | 1.04        |
|                | dist + dir                                                                                                 | 0.842        | 1323.6        | 3.3         | 23.52        | 4.85        | 4.71        | 359.85        | -4.71        | -335.64         | 1.06        |
|                | <i>dist + slope</i>                                                                                        | <b>0.726</b> | <b>1587.2</b> | <b>1.1</b>  | <b>19.19</b> | <b>4.38</b> | <b>4.30</b> | <b>469.66</b> | <b>-4.30</b> | <b>-302.53</b>  | <b>1.04</b> |
|                | dist + slope                                                                                               | 0.822        | 1336.7        | 4.5         | 22.44        | 4.74        | 4.62        | 349.54        | -4.62        | -332.89         | 1.05        |
| 1997 –<br>1999 | dist                                                                                                       | 0.926        | 706.1         | 4.0         | 109.46       | 10.45       | 9.29        | 411.09        | -9.29        | -1396.50        | 1.25        |
|                | <i>dir</i>                                                                                                 | <b>0.904</b> | <b>625.1</b>  | <b>10.4</b> | <b>47.28</b> | <b>6.87</b> | <b>6.71</b> | <b>367.33</b> | <b>-6.71</b> | <b>-1008.49</b> | <b>1.05</b> |



|                |                                                                                                                                                                                 |              |               |             |              |             |             |               |              |                 |             |
|----------------|---------------------------------------------------------------------------------------------------------------------------------------------------------------------------------|--------------|---------------|-------------|--------------|-------------|-------------|---------------|--------------|-----------------|-------------|
|                | dist + dir                                                                                                                                                                      | 0.954        | 578.8         | 14.9        | 139.95       | 11.76       | 10.81       | 355.71        | -10.81       | -1628.37        | 1.17        |
|                | dist + bsm                                                                                                                                                                      | 0.959        | 577.3         | 11.5        | 110.73       | 10.52       | 9.72        | 332.77        | -9.72        | -1464.16        | 1.18        |
| 1999 -<br>2000 | <b>dir</b>                                                                                                                                                                      | <b>0.859</b> | <b>454.8</b>  | <b>8.4</b>  | <b>49.65</b> | <b>7.04</b> | <b>6.90</b> | <b>427.56</b> | <b>-6.90</b> | <b>-1713.09</b> | <b>1.04</b> |
|                | bsm                                                                                                                                                                             | 0.960        | 406.5         | 5.3         | 123.34       | 11.09       | 10.22       | 361.24        | -10.22       | -2527.80        | 1.19        |
|                | dist + dir                                                                                                                                                                      | 0.885        | 446.2         | 11.1        | 54.75        | 7.39        | 7.18        | 420.04        | -7.18        | -1782.38        | 1.06        |
|                | dir + bsm                                                                                                                                                                       | 0.965        | 377.0         | 3.5         | 91.35        | 9.54        | 8.98        | 308.19        | -8.98        | -2223.87        | 1.14        |
|                | dist + dir + bsm                                                                                                                                                                | 0.970        | 369.6         | 5.7         | 99.74        | 9.97        | 9.37        | 301.48        | -9.37        | -2320.26        | 1.15        |
| 2000 -<br>2002 | dist + dist <sup>2</sup> + dist <sup>3</sup> + aspect + slope + slope <sup>2</sup>                                                                                              | 0.881        | 1751.9        | 6.0         | 39.56        | 6.29        | 5.87        | 365.04        | -5.87        | -327.84         | 1.15        |
|                | dist + dist <sup>2</sup> + dist <sup>3</sup> + slope + slope <sup>2</sup>                                                                                                       | 0.877        | 1757.5        | 6.1         | 39.81        | 6.31        | 5.88        | 368.05        | -5.88        | -328.49         | 1.15        |
|                | dir + bsm + bsm <sup>2</sup> + bsm <sup>3</sup>                                                                                                                                 | 0.891        | 1544.3        | 12.4        | 123.37       | 11.11       | 8.46        | 332.73        | -8.46        | -472.41         | 1.74        |
|                | <b>dir + slope + slope<sup>2</sup></b>                                                                                                                                          | <b>0.818</b> | <b>1653.5</b> | <b>11.6</b> | <b>25.89</b> | <b>5.09</b> | <b>4.96</b> | <b>359.30</b> | <b>-4.96</b> | <b>-276.86</b>  | <b>1.05</b> |
|                | dir + bsm + bsm <sup>2</sup> + bsm <sup>3</sup> + slope + slope <sup>2</sup>                                                                                                    | 0.901        | 1538.7        | 12.5        | 132.31       | 11.50       | 8.66        | 327.75        | -8.66        | -484.02         | 1.78        |
| 2002 -<br>2006 | dist + dir + Ivan                                                                                                                                                               | 0.895        | 532.8         | 1.2         | 59.87        | 7.74        | 7.32        | 424.04        | -7.32        | -1576.08        | 1.22        |
|                | dist+ slope + slope <sup>2</sup> + bsm                                                                                                                                          | 0.918        | 499.9         | 3.3         | 51.17        | 7.15        | 6.91        | 405.45        | -6.91        | -1385.78        | 1.11        |
|                | dist+ dir + slope + slope <sup>2</sup> + bsm                                                                                                                                    | 0.925        | 489.8         | -139.3      | 42.56        | 6.51        | 6.11        | 247.42        | -6.10        | -1241.89        | 1.19        |
| 2006 -<br>2008 | dir + dir <sup>2</sup> + dir <sup>3</sup> + slope + slope <sup>2</sup> + slope <sup>3</sup> + slope <sup>4</sup>                                                                | 0.779        | 3750.3        | -486.0      | 0.99         | 0.60        | 0.35        | 120.22        | -0.15        | -3.62           | 15.73       |
|                | <b>bsm + bsm<sup>2</sup> + bsm<sup>3</sup> + Ivan</b>                                                                                                                           | <b>0.718</b> | <b>3292.8</b> | <b>12.2</b> | <b>11.72</b> | <b>3.42</b> | <b>3.34</b> | <b>321.85</b> | <b>-3.33</b> | <b>-77.90</b>   | <b>0.96</b> |
|                | dist+ dist <sup>2</sup> + dist <sup>3</sup> + dist <sup>4</sup> + aspect + bsm + bsm <sup>2</sup> + bsm <sup>3</sup>                                                            | 0.843        | 2815.8        | 11.3        | 18.24        | 4.26        | 3.92        | 241.84        | -3.89        | -91.52          | 1.26        |
|                | dir + dir <sup>2</sup> + dir <sup>3</sup> + dir <sup>4</sup> + slope + slope <sup>2</sup> + slope <sup>3</sup> + slope <sup>4</sup> + bsm + bsm <sup>2</sup> + bsm <sup>3</sup> | 0.727        | 2831.8        | -516.5      | 0.04         | 0.21        | 0.06        | 97.37         | -0.05        | -0.99           | 0.96        |
|                | bsm + bsm <sup>2</sup> + bsm <sup>3</sup> + Avg                                                                                                                                 | 0.696        | 3343.0        | 11.9        | 11.98        | 3.46        | 3.39        | 338.51        | -3.38        | -79.17          | 1.04        |
| 2008 -<br>2010 | dist+ dist <sup>2</sup> + dist <sup>3</sup> + dist <sup>4</sup>                                                                                                                 | 0.735        | 2800.7        | 1.5         | 16.19        | 4.02        | 3.81        | 377.16        | -3.81        | -112.62         | 1.11        |
|                | dist+ dist <sup>2</sup> + dist <sup>3</sup> + dist <sup>4</sup> + dir                                                                                                           | 0.783        | 2720.6        | 2.8         | 16.89        | 4.11        | 3.88        | 350.16        | -3.88        | -120.97         | 1.12        |
|                | dir + bsm + bsm <sup>2</sup> + bsm <sup>3</sup> + bsm <sup>4</sup>                                                                                                              | 0.692        | 2914.9        | 1.8         | 14.20        | 3.77        | 3.63        | 390.09        | -3.63        | -121.14         | 1.08        |
|                | <b>aspect + bsm + bsm<sup>2</sup> + bsm<sup>3</sup> + bsm<sup>4</sup></b>                                                                                                       | <b>0.726</b> | <b>2876.4</b> | <b>1.2</b>  | <b>13.65</b> | <b>3.69</b> | <b>3.54</b> | <b>377.66</b> | <b>-3.54</b> | <b>-111.90</b>  | <b>1.09</b> |
| 2010 -<br>2013 | <b>dist+ dist<sup>2</sup> + dist<sup>3</sup> + bsm</b>                                                                                                                          | <b>0.930</b> | <b>3024.0</b> | <b>37.2</b> | <b>21.79</b> | <b>4.67</b> | <b>4.33</b> | <b>178.08</b> | <b>-4.27</b> | <b>-66.27</b>   | <b>1.20</b> |

|                |                                                                                                                |              |               |             |              |             |             |               |              |                 |             |
|----------------|----------------------------------------------------------------------------------------------------------------|--------------|---------------|-------------|--------------|-------------|-------------|---------------|--------------|-----------------|-------------|
|                | dist+ dist <sup>2</sup> + dist <sup>3</sup> + bsm + slope + slope <sup>2</sup>                                 | 0.936        | 2963.1        | 37.3        | 23.02        | 4.80        | 4.43        | 178.87        | -4.35        | -67.53          | 1.22        |
|                | dist+ dist <sup>2</sup> + dist <sup>3</sup> + bsm + Avg.                                                       | 0.930        | 3003.3        | 36.3        | 21.94        | 4.68        | 4.32        | 179.95        | -4.24        | -65.83          | 1.32        |
|                | dist+ dist <sup>2</sup> + dist <sup>3</sup> + bsm + slope + slope <sup>2</sup> + Avg.                          | 0.936        | 2933.8        | 38.4        | 23.63        | 4.86        | 4.49        | 182.91        | -4.40        | -69.07          | 1.30        |
|                | dist+ dist <sup>2</sup> + dist <sup>3</sup> + bsm + slope + slope <sup>2</sup> + Ivan                          | 0.935        | 2960.1        | 37.5        | 23.09        | 4.80        | 4.44        | 179.75        | -4.36        | -67.64          | 1.25        |
|                | dist+ dist <sup>2</sup> + dist <sup>3</sup> + bsm + Dean                                                       | 0.930        | 2992.3        | 38.4        | 22.67        | 4.76        | 4.40        | 179.57        | -4.34        | -67.35          | 1.28        |
| 2013 -<br>2015 | <b>dist+ dist<sup>2</sup> + dist<sup>3</sup> + dist<sup>4</sup> + dir + aspect + slope + slope<sup>2</sup></b> | <b>0.704</b> | <b>5268.8</b> | <b>5.6</b>  | <b>7.94</b>  | <b>2.82</b> | <b>2.71</b> | <b>302.82</b> | <b>-2.71</b> | <b>-38.65</b>   | <b>1.07</b> |
|                | dist+ dist <sup>2</sup> + dist <sup>3</sup> + dist <sup>4</sup> + dir + Ivan                                   | 0.688        | 5321.6        | 5.8         | 8.12         | 2.85        | 2.76        | 316.04        | -2.76        | -39.38          | 1.02        |
|                | dist+ dist <sup>2</sup> + dist <sup>3</sup> + dist <sup>4</sup> + dir + aspect + Ivan                          | 0.695        | 5308.2        | 5.8         | 8.04         | 2.84        | 2.74        | 312.14        | -2.74        | -39.12          | 1.03        |
|                | dist+ dist <sup>2</sup> + dist <sup>3</sup> + dist <sup>4</sup> + dir + slope + slope <sup>2</sup> + Ivan      | 0.702        | 5276.7        | 5.7         | 8.05         | 2.84        | 2.73        | 306.43        | -2.73        | -38.99          | 1.03        |
|                | dist+ dist <sup>2</sup> + dist <sup>3</sup> + dist <sup>4</sup> + dir + Avg.                                   | 0.687        | 5323.1        | 5.7         | 8.03         | 2.83        | 2.74        | 314.53        | -2.74        | -39.12          | 1.04        |
| 2015 -<br>2016 | bsm                                                                                                            | 0.950        | 227.9         | 5.8         | 150.83       | 12.06       | 11.24       | 465.03        | -11.24       | -5843.99        | 1.17        |
|                | <b>dist+ dist<sup>2</sup> + dist<sup>3</sup></b>                                                               | <b>0.919</b> | <b>250.4</b>  | <b>6.9</b>  | <b>66.50</b> | <b>8.15</b> | <b>7.98</b> | <b>461.08</b> | <b>-7.98</b> | <b>-4492.31</b> | <b>1.04</b> |
|                | dist+ dist <sup>2</sup> + dist <sup>3</sup> + dir                                                              | 0.937        | 242.1         | 4.0         | 67.36        | 8.21        | 8.00        | 426.72        | -8.00        | -4538.80        | 1.05        |
|                | dir + bsm                                                                                                      | 0.949        | 235.8         | 2.3         | 103.02       | 10.13       | 9.57        | 380.00        | -9.57        | -5388.82        | 1.14        |
| 2016 -<br>2017 | <b>dist+ dist<sup>2</sup> + dir + dir<sup>2</sup> + dir<sup>3</sup></b>                                        | <b>0.655</b> | <b>2954.4</b> | <b>0.4</b>  | <b>10.80</b> | <b>3.29</b> | <b>3.24</b> | <b>400.90</b> | <b>-3.24</b> | <b>-108.61</b>  | <b>1.02</b> |
|                | dist+ dist <sup>2</sup> + dir + dir <sup>2</sup> + dir <sup>3</sup> + aspect                                   | 0.658        | 2947.8        | 0.0         | 10.93        | 3.30        | 3.25        | 399.65        | -3.25        | -109.07         | 1.02        |
|                | dist+ dist <sup>2</sup> + dir + dir <sup>2</sup> + dist <sup>3</sup> + bsm                                     | 0.662        | 2905.3        | 1.2         | 12.34        | 3.51        | 3.45        | 407.10        | -3.45        | -115.66         | 1.02        |
| 2017 -<br>2019 | <b>dir</b>                                                                                                     | <b>0.726</b> | <b>2250.2</b> | <b>11.0</b> | <b>17.67</b> | <b>4.20</b> | <b>4.10</b> | <b>345.91</b> | <b>-4.10</b> | <b>-154.69</b>  | <b>1.05</b> |
|                | dist + dir                                                                                                     | 0.863        | 2142.1        | 11.9        | 25.35        | 5.03        | 4.77        | 336.99        | -4.77        | -179.85         | 1.10        |
|                | dist + bsm + bsm <sup>2</sup>                                                                                  | 0.859        | 2190.1        | 10.2        | 25.31        | 5.03        | 4.72        | 338.53        | -4.72        | -178.08         | 1.13        |
|                | dir + aspect                                                                                                   | 0.734        | 2244.6        | 10.9        | 17.86        | 4.23        | 4.12        | 345.45        | -4.12        | -155.53         | 1.05        |
|                | dist + dir + aspect                                                                                            | 0.865        | 2137.7        | 11.8        | 25.49        | 5.05        | 4.78        | 335.50        | -4.78        | -180.30         | 1.10        |
| 2019 -<br>2020 | dist + dist <sup>2</sup> + dist <sup>3</sup> + dist <sup>4</sup> + dir                                         | 0.912        | 1654.0        | 36.3        | 40.76        | 6.38        | 5.95        | 167.82        | -5.92        | -187.55         | 1.17        |
|                | dir + bsm + bsm <sup>2</sup>                                                                                   | 0.921        | 1806.1        | 33.5        | 36.86        | 6.07        | 5.70        | 231.35        | -5.70        | -180.08         | 1.13        |
|                | <b>dist + dist<sup>2</sup> + dist<sup>3</sup> + dist<sup>4</sup> + dir + aspect</b>                            | <b>0.914</b> | <b>1701.7</b> | <b>32.7</b> | <b>36.74</b> | <b>6.05</b> | <b>5.65</b> | <b>144.04</b> | <b>-5.60</b> | <b>-192.83</b>  | <b>1.18</b> |
|                | dir + aspect + bsm + bsm <sup>2</sup>                                                                          | 0.923        | 1786.8        | 33.8        | 37.20        | 6.10        | 5.72        | 227.30        | -5.72        | -180.91         | 1.13        |
|                | dir + slope + bsm + bsm <sup>2</sup>                                                                           | 0.928        | 1765.3        | 34.2        | 37.75        | 6.14        | 5.77        | 223.43        | -5.77        | -182.35         | 1.13        |

|                |                                               |       |              |             |              |             |             |               |              |                 |             |
|----------------|-----------------------------------------------|-------|--------------|-------------|--------------|-------------|-------------|---------------|--------------|-----------------|-------------|
|                | dir + aspect + slope + bsm + bsm <sup>2</sup> | 0.930 | 1747.7       | 34.5        | 38.05        | 6.17        | 5.79        | 219.10        | -5.79        | -182.98         | 1.14        |
| 2020 -<br>2021 | <i>dist + dist<sup>2</sup></i>                |       | <b>202.7</b> | <b>-0.4</b> | <b>38.43</b> | <b>6.71</b> | <b>6.76</b> | <b>570.82</b> | <b>-6.76</b> | <b>-4331.92</b> | <b>1.02</b> |
|                | dir + dir <sup>2</sup>                        |       | 176.6        | -1.7        | 42.26        | 6.96        | 7.11        | 506.86        | -7.11        | -4559.38        | 1.01        |

dir = direction from river mouth; dis = distance from river mouth; bsm = bathymetric surface model (depth); Ivan = exposure vulnerability (EV) for Hurricane Ivan; Dean = EV for Hurricane Dean; Avg. = average EV for Ivan and Dean.

**Table S3.** Validation criteria for finals models that included the most important predictors of submerged aquatic vegetation (SAV) percentage cover change in the Bluefields Bay Special Fish Conservation Area (BBSFCA), Westmoreland, Jamaica, for 23, 2 – 4-year periods, generated using a 5-fold cross validation of spatial Bayesian Integrated Nested Laplace Approximation (INLA) generalized linear mixed models. The validation criteria used included: mean squared error (MSE), root mean squared error (RMSE), mean absolute error (MAE), mean absolute percentage error (MAPE), bias (a measure of consistent under- or over-forecasting; BIAS), relative bias (rBIAS), and relative mean separation (rMSEP). Also included are the calculated values for the deviance information criterion (DIC), and marginal R-squared (mR<sup>2</sup>).

| Period      | Predictors                                                                                                                                                                                            | DIC            | mR <sup>2</sup> | MSE         | RMSE        | MAE         | MAPE          | BIAS           | rBIAS         | rMSEP       |
|-------------|-------------------------------------------------------------------------------------------------------------------------------------------------------------------------------------------------------|----------------|-----------------|-------------|-------------|-------------|---------------|----------------|---------------|-------------|
| 1984 - 1985 | dist+ dist <sup>2</sup> + dist <sup>3</sup> + dist <sup>4</sup> + bsm + bsm <sup>2</sup> + bsm <sup>3</sup> + bsm <sup>4</sup>                                                                        | 47181.8        | 15.2            | 3.92        | 1.98        | 1.47        | 445.48        | 0.0001         | 0.04          | 0.85        |
|             | slope + bsm + bsm <sup>2</sup> + bsm <sup>3</sup> + bsm <sup>4</sup>                                                                                                                                  | 47600.9        | 11.9            | 4.06        | 2.02        | 1.50        | 319.60        | -0.0003        | 0.04          | 0.88        |
|             | <b>dist+ dist<sup>2</sup> + dist<sup>3</sup> + dist<sup>4</sup> + aspect + aspect<sup>2</sup> + bsm + bsm<sup>2</sup> + bsm<sup>3</sup>+ bsm<sup>4</sup></b>                                          | <b>47115.0</b> | <b>15.7</b>     | <b>3.89</b> | <b>1.97</b> | <b>1.47</b> | <b>438.14</b> | <b>0.0001</b>  | <b>0.04</b>   | <b>0.84</b> |
|             | dist+ dist <sup>2</sup> + dist <sup>3</sup> + dist <sup>4</sup> + slope + bsm + bsm <sup>2</sup> + bsm <sup>3</sup> + bsm <sup>4</sup>                                                                | 47182.0        | 15.2            | 3.92        | 1.98        | 1.47        | 445.57        | 0.0001         | 0.04          | 0.85        |
|             | <b>dist+ dist<sup>2</sup> + dist<sup>3</sup> + dist<sup>4</sup> + aspect + aspect<sup>2</sup> + slope + bsm + bsm<sup>2</sup> + bsm<sup>3</sup>+ bsm<sup>4</sup></b>                                  | <b>47115.4</b> | <b>15.8</b>     | <b>3.89</b> | <b>1.97</b> | <b>1.47</b> | <b>438.35</b> | <b>0.0001</b>  | <b>0.04</b>   | <b>0.84</b> |
| 1985 - 1986 | <b>dist+ dist<sup>2</sup> + dist<sup>3</sup> + dist<sup>4</sup> + dir + dir<sup>2</sup></b>                                                                                                           | <b>22003.5</b> | <b>11.3</b>     | <b>0.41</b> | <b>0.64</b> | <b>0.49</b> | <b>754.78</b> | <b>-0.0001</b> | <b>0.001</b>  | <b>0.89</b> |
|             | dist+ dist <sup>2</sup> + dist <sup>3</sup> + dist <sup>4</sup> + bsm + bsm <sup>2</sup> + bsm <sup>3</sup> + bsm <sup>4</sup>                                                                        | 22080.4        | 10.7            | 0.42        | 0.64        | 0.49        | 808.13        | -0.0001        | 0.002         | 0.89        |
|             | dist+ dist <sup>2</sup> + dist <sup>3</sup> + dist <sup>4</sup>                                                                                                                                       | 22375.4        | 8.3             | 0.43        | 0.65        | 0.50        | 832.29        | -0.0001        | 0.001         | 0.92        |
|             | aspect + aspect <sup>2</sup> + aspect <sup>3</sup> + aspect <sup>4</sup> + slope + slope <sup>2</sup> + slope <sup>3</sup> + bsm + bsm <sup>2</sup> + bsm <sup>3</sup> + bsm <sup>4</sup>             | 22865.2        | 4.3             | 0.45        | 0.67        | 0.51        | 743.04        | 0.00004        | 0.002         | 0.96        |
|             | slope + slope <sup>2</sup> + slope <sup>3</sup> + bsm + bsm <sup>2</sup> + bsm <sup>3</sup> + bsm <sup>4</sup>                                                                                        | 22914.2        | 3.8             | 0.45        | 0.67        | 0.51        | 729.59        | 0.00002        | 0.001         | 0.96        |
| 1986 - 1987 | dist+ dist <sup>2</sup> + dist <sup>3</sup> + dist <sup>4</sup> + bsm + bsm <sup>2</sup> + bsm <sup>3</sup>                                                                                           | 17980.5        | 31.9            | 0.29        | 0.54        | 0.43        | 564.6         | -              | 0.0003        | 0.68        |
|             | dist+ dist <sup>2</sup> + dist <sup>3</sup> + dist <sup>4</sup> + dir + dir <sup>2</sup> + dir <sup>3</sup> + dir <sup>4</sup> + bsm + bsm <sup>2</sup> + bsm <sup>3</sup>                            | 17577.8        | 34.4            | 0.28        | 0.53        | 0.42        | 481.6         | 0.00004        | 0.0001        | 0.66        |
|             | dist+ dist <sup>2</sup> + dist <sup>3</sup> + dist <sup>4</sup> + slope + slope <sup>2</sup> + bsm + bsm <sup>2</sup> + bsm <sup>3</sup>                                                              | 17881.7        | 32.6            | 0.29        | 0.54        | 0.42        | 547.9         | 0              | 0.0002        | 0.68        |
|             | <b>dist+ dist<sup>2</sup> + dist<sup>3</sup> + dist<sup>4</sup> + dir + dir<sup>2</sup> + dir<sup>3</sup> + dir<sup>4</sup> + slope + slope<sup>2</sup> + bsm + bsm<sup>2</sup> + bsm<sup>3</sup></b> | <b>17505.6</b> | <b>34.8</b>     | <b>0.28</b> | <b>0.53</b> | <b>0.42</b> | <b>471.5</b>  | <b>0.0001</b>  | <b>0.0001</b> | <b>0.65</b> |
|             | dir + dir <sup>2</sup> + dir <sup>3</sup> + dir <sup>4</sup> + slope + slope <sup>2</sup> + bsm + bsm <sup>2</sup> + bsm <sup>3</sup>                                                                 | 18819.0        | 26.7            | 0.31        | 0.56        | 0.44        | 512.9         | 0.0001         | 0.00008       | 0.74        |

|                |                                                                                                                                      |                |             |             |             |             |               |                |               |             |
|----------------|--------------------------------------------------------------------------------------------------------------------------------------|----------------|-------------|-------------|-------------|-------------|---------------|----------------|---------------|-------------|
| 1987 -<br>1988 | $dist + dist^2 + dist^3 + dist^4 + dir + dir^2 + dir^3 + dir^4$                                                                      | <b>19893.1</b> | <b>42.2</b> | <b>0.34</b> | <b>0.58</b> | <b>0.47</b> | <b>792.57</b> | <b>-0.0001</b> | <b>0.0001</b> | <b>0.58</b> |
|                | $dist + dist^2 + dist^3 + dist^4 + dir + dir^2 + dir^3 + dir^4 + Gilbert$                                                            | <b>19884.4</b> | <b>42.3</b> | <b>0.34</b> | <b>0.58</b> | <b>0.47</b> | <b>785.17</b> | <b>-0.0002</b> | <b>0</b>      | <b>0.58</b> |
|                | $dir + dir^2 + dir^3 + dir^4 + aspect + aspect^2 + aspect^3 + aspect^4 + slope + slope^2 + slope^3 + Gilbert$                        | 22187.4        | 29.3        | 0.42        | 0.65        | 0.52        | 888.98        | -0.0001        | 0.0002        | 0.71        |
|                | $dir + dir^2 + dir^3 + dir^4 + aspect + aspect^2 + aspect^3 + aspect^4 + slope + slope^2 + slope^3$                                  | 22407.1        | 29.1        | 0.42        | 0.65        | 0.52        | 900.69        | -0.0001        | 0.0002        | 0.71        |
|                | $dir + dir^2 + dir^3 + dir^4 + slope + slope^2 + slope^3 + Gilbert$                                                                  | 22275.9        | 28.7        | 0.42        | 0.65        | 0.52        | 909.27        | -0.0001        | 0.0003        | 0.72        |
| 1988 -<br>1990 | $dist + dist^2 + dist^3 + dist^4 + dir + dir^2 + dir^3 + dir^4 + bsm + bsm^2 + bsm^3$                                                | 11982.4        | 31.0        | 0.17        | 0.41        | 0.31        | 530.52        | -              | 0.0001        | 0.69        |
|                | $dist + dist^2 + dist^3 + dist^4 + dir + dir^2 + dir^3 + dir^4 + slope + slope^2 + slope^3 + bsm + bsm^2 + bsm^3$                    | 11953.0        | 31.2        | 0.17        | 0.41        | 0.31        | 543.87        | -0.0001        | -0.0002       | 0.69        |
|                | $dist + dist^2 + dist^3 + dist^4 + dir + dir^2 + dir^3 + dir^4 + bsm + bsm^2 + bsm^3 + Gilbert$                                      | 11968.0        | 31.1        | 0.17        | 0.41        | 0.31        | 526.65        | -              | 0             | 0.69        |
|                | $dist + dist^2 + dist^3 + dist^4 + dir + dir^2 + dir^3 + dir^4 + aspect + bsm + bsm^2 + bsm^3 + Gilbert$                             | <b>11963.2</b> | <b>31.1</b> | <b>0.17</b> | <b>0.41</b> | <b>0.31</b> | <b>518.22</b> | <b>0</b>       | <b>0.0001</b> | <b>0.69</b> |
|                | $dist + dist^2 + dist^3 + dist^4 + dir + dir^2 + dir^3 + dir^4 + aspect + slope + slope^2 + slope^3 + bsm + bsm^2 + bsm^3 + Gilbert$ | 11939.3        | 31.3        | 0.17        | 0.41        | 0.31        | 530.53        | -0.0001        | -0.0003       | 0.69        |
| 1990-<br>1993  | $bsm + bsm^2 + bsm^3 + bsm^4$                                                                                                        | <b>3135.8</b>  | <b>27.4</b> | <b>0.08</b> | <b>0.27</b> | <b>0.21</b> | <b>105.05</b> | <b>-0.003</b>  | <b>0.004</b>  | <b>0.70</b> |
|                | $dist + dist^2 + dist^3 + dist^4 + dir$                                                                                              | 5231.5         | 12.6        | 0.09        | 0.31        | 0.24        | 142.30        | -0.005         | 0.006         | 0.86        |
|                | $dist + dist^2 + dist^3 + dist^4 + aspect$                                                                                           | 5403.8         | 11.2        | 0.10        | 0.31        | 0.24        | 147.05        | -0.005         | 0.005         | 0.88        |
|                | $aspect + bsm + bsm^2 + bsm^3 + bsm^4$                                                                                               | 3111.0         | 27.5        | 0.08        | 0.27        | 0.21        | 105.56        | -0.003         | 0.003         | 0.70        |
|                | $dist + dist^2 + dist^3 + dist^4 + dir + aspect$                                                                                     | 5176.5         | 13.0        | 0.09        | 0.30        | 0.24        | 142.42        | -0.005         | 0.006         | 0.86        |
| 1993-<br>1994  | $dist + dist^2 + dist^3 + dir + dir^2 + dir^3$                                                                                       | 24537.5        | 21.7        | 0.52        | 0.72        | 0.57        | 248.79        | -              | 0.00008       | 0.78        |
|                | $dist + dist^2 + dist^3 + bsm + bsm^2 + bsm^3 + bsm^4$                                                                               | 25268.1        | 16.5        | 0.55        | 0.74        | 0.59        | 287.90        | -              | 0.00004       | 0.84        |
|                | $dir + dir^2 + dir^3 + bsm + bsm^2 + bsm^3 + bsm^4$                                                                                  | 25432.4        | 15.3        | 0.56        | 0.75        | 0.59        | 258.54        | -              | 0.00006       | 0.85        |

|                |                                                                                                    |         |      |      |      |      |        |              |         |      |
|----------------|----------------------------------------------------------------------------------------------------|---------|------|------|------|------|--------|--------------|---------|------|
|                | $dist + dist^2 + dist^3 + dir + dir^2 + dir^3 + bsm + bsm^2 + bsm^3 + bsm^4$                       | 24175.6 | 24.2 | 0.50 | 0.71 | 0.56 | 250.51 | -<br>0.00004 | 0.00002 | 0.76 |
|                | $dist + dist^2 + dist^3 + slope + slope^2 + bsm + bsm^2 + bsm^3 + bsm^4$                           | 25237.5 | 16.7 | 0.55 | 0.74 | 0.59 | 282.75 | -<br>0.00004 | 0.00004 | 0.83 |
| 1994 -<br>1995 | $dir + dir^2 + dir^3 + dir^4$                                                                      | 23522.6 | 12.9 | 0.47 | 0.69 | 0.53 | 438.30 | -0.0001      | 0.01    | 0.87 |
|                | $dist + dist^2 + dist^3 + dist^4 + dir + dir^2 + dir^3 + dir^4$                                    | 22171.8 | 22.8 | 0.42 | 0.65 | 0.50 | 390.63 | 0.0001       | 0.01    | 0.77 |
|                | $dist + dist^2 + dist^3 + dist^4 + aspect$                                                         | 23489.8 | 13.1 | 0.47 | 0.68 | 0.52 | 356.43 | 0.00004      | 0.01    | 0.87 |
|                | $dist + dist^2 + dist^3 + dist^4 + bsm + bsm^2 + bsm^3 + bsm^4$                                    | 23343.4 | 14.3 | 0.46 | 0.68 | 0.52 | 384.40 | 0.0001       | 0.01    | 0.86 |
|                | $dir + dir^2 + dir^3 + dir^4 + bsm + bsm^2 + bsm^3 + bsm^4$                                        | 23219.0 | 11.9 | 0.48 | 0.69 | 0.53 | 414.60 | 0.0145       | -0.06   | 0.88 |
| 1995 -<br>1996 | $dist + dist^2 + dist^3$                                                                           | 28916.1 | 16.2 | 0.76 | 0.87 | 0.67 | 635.43 | -<br>0.00004 | 0.21    | 0.84 |
|                | $dir + dir^2 + dir^3 + dir^4$                                                                      | 30191.2 | 6.2  | 0.85 | 0.92 | 0.69 | 484.47 | 0.0001       | 0.18    | 0.94 |
|                | $dir + dir^2 + dir^3 + dir^4 + aspect + aspect^2 + aspect^3$                                       | 30039.8 | 7.5  | 0.84 | 0.91 | 0.69 | 517.05 | 0.00004      | 0.20    | 0.93 |
|                | $dir + dir^2 + dir^3 + dir^4 + aspect + aspect^2 + aspect^3 + slope + slope^2 + slope^3 + slope^4$ | 30084.9 | 7.1  | 0.84 | 0.92 | 0.69 | 511.67 | 0.0003       | 0.19    | 0.93 |
| 1996 -<br>1997 | $dir + dir^2 + dir^3 + dir^4$                                                                      | 26967.8 | 4.3  | 0.63 | 0.80 | 0.60 | 761.44 | -<br>0.00006 | 0.002   | 0.96 |
|                | $dist + dist^2 + dist^3 + dist^4 + dir + dir^2 + dir^3 + dir^4$                                    | 26376.9 | 8.6  | 0.61 | 0.78 | 0.60 | 888.80 | -<br>0.00004 | 0.003   | 0.92 |
|                | $dist + dist^2 + dist^3 + dist^4 + bsm + bsm^2 + bsm^3$                                            | 26929.1 | 3.9  | 0.64 | 0.80 | 0.61 | 692.12 | 0.0001       | 0.004   | 0.96 |
|                | $dir + dir^2 + dir^3 + dir^4 + aspect$                                                             | 26875.9 | 4.4  | 0.63 | 0.80 | 0.60 | 743.82 | -0.0001      | 0.002   | 0.96 |
|                | $dir + dir^2 + dir^3 + dir^4 + slope$                                                              | 26875.0 | 4.4  | 0.63 | 0.80 | 0.60 | 768.01 | -0.0001      | 0.002   | 0.96 |
| 1997 –<br>1999 | $dist + dist^2 + dist^3 + dist^4 + dir + dir^2 + dir^3 + dir^4$                                    | 6936.3  | 22.6 | 0.11 | 0.33 | 0.25 | 524.16 | 0            | 0.0013  | 0.77 |
|                | $dist + dist^2 + dist^3 + dist^4 + slope + slope^2 + slope^3$                                      | 5622.5  | 31.1 | 0.10 | 0.31 | 0.24 | 607.85 | 0.00004      | 0.0011  | 0.69 |
|                | $dir + dir^2 + dir^3 + bsm + bsm^2 + bsm^3 + bsm^4$                                                | 6831.6  | 23.3 | 0.11 | 0.33 | 0.25 | 531.90 | -<br>0.00002 | 0.0012  | 0.77 |
|                | $dir + dir^2 + dir^3 + bsm + bsm^2 + bsm^3 + bsm^4 + slope + slope^2 + slope^3$                    | 7876.9  | 15.9 | 0.12 | 0.34 | 0.27 | 670.95 | 0            | 0.0011  | 0.84 |
| 1999 -<br>2000 | $dist + dist^2 + dist^3 + dist^4 + dir + dir^2 + dir^3 + dir^4$                                    | 56256.7 | 11.2 | 8.51 | 2.92 | 2.19 | 660.81 | -0.0003      | 0.006   | 0.89 |
|                | $dist + dist^2 + dist^3 + dist^4 + bsm + bsm^2 + bsm^3$                                            | 56655.2 | 8.0  | 8.82 | 2.97 | 2.19 | 665.53 | -0.0001      | 0.005   | 0.92 |

|             |                                                                                                                                                                                                                          |                |             |             |             |             |               |                |                |             |
|-------------|--------------------------------------------------------------------------------------------------------------------------------------------------------------------------------------------------------------------------|----------------|-------------|-------------|-------------|-------------|---------------|----------------|----------------|-------------|
|             | <i>dist+ dist<sup>2</sup> + dist<sup>3</sup> + dist<sup>4</sup> + dir + dir<sup>2</sup> + dir<sup>3</sup> + dir<sup>4</sup> + slope + slope<sup>2</sup></i>                                                              | <b>56337.5</b> | <b>11.3</b> | <b>8.51</b> | <b>2.92</b> | <b>2.19</b> | <b>651.03</b> | <b>-0.0007</b> | <b>0.006</b>   | <b>0.89</b> |
|             | dist+ dist <sup>2</sup> + dist <sup>3</sup> + dist <sup>4</sup> + aspect + aspect <sup>2</sup> + aspect <sup>3</sup> + bsm + bsm <sup>2</sup> + bsm <sup>3</sup>                                                         | 56632.8        | 8.2         | 8.80        | 2.97        | 2.19        | 666.19        | -0.0003        | 0.005          | 0.92        |
|             | dist+ dist <sup>2</sup> + dist <sup>3</sup> + dist <sup>4</sup> + aspect + aspect <sup>2</sup> + aspect <sup>3</sup> + slope + slope <sup>2</sup> + bsm + bsm <sup>2</sup> + bsm <sup>3</sup>                            | 56632.9        | 8.3         | 8.80        | 2.97        | 2.20        | 661.64        | -0.0004        | 0.005          | 0.92        |
| 2000 - 2002 | dist+ dist <sup>2</sup> + dist <sup>3</sup> + dist <sup>4</sup>                                                                                                                                                          | 8981.4         | 33.4        | 0.13        | 0.36        | 0.28        | 343.23        | 0.004          | -0.02          | 0.66        |
|             | <i>dist+ dist<sup>2</sup> + dist<sup>3</sup> + dist<sup>4</sup> + dir</i>                                                                                                                                                | <b>8972.2</b>  | <b>33.5</b> | <b>0.13</b> | <b>0.36</b> | <b>0.28</b> | <b>326.03</b> | <b>0.003</b>   | <b>-0.02</b>   | <b>0.66</b> |
|             | dist+ dist <sup>2</sup> + dist <sup>3</sup> + dist <sup>4</sup> + bsm + bsm <sup>2</sup>                                                                                                                                 | 8628.5         | 35.5        | 0.12        | 0.35        | 0.27        | 442.10        | 0.005          | -0.03          | 0.64        |
|             | dist+ dist <sup>2</sup> + dist <sup>3</sup> + dist <sup>4</sup> + dir + bsm + bsm <sup>2</sup>                                                                                                                           | 8579.1         | 35.8        | 0.12        | 0.35        | 0.28        | 403.65        | 0.004          | -0.03          | 0.64        |
| 2002 - 2006 | dist+ dist <sup>2</sup> + dist <sup>3</sup> + dist <sup>4</sup>                                                                                                                                                          | 9973.7         | 12.8        | 0.15        | 0.38        | 0.30        | 509.2         | 0.00004        | 0.00060        | 0.9         |
|             | dist+ dist <sup>2</sup> + dist <sup>3</sup> + dist <sup>4</sup> + dir + dir <sup>2</sup> + dir <sup>3</sup>                                                                                                              | 9649.7         | 15.4        | 0.14        | 0.38        | 0.30        | 480.6         | 0.00014        | 0.00034        | 0.8         |
|             | dist+ dist <sup>2</sup> + dist <sup>3</sup> + dist <sup>4</sup> + aspect + aspect <sup>2</sup> + aspect <sup>3</sup>                                                                                                     | 9939.4         | 13.1        | 0.15        | 0.38        | 0.30        | 500.1         | 0.00004        | 0.00068        | 0.9         |
|             | <i>dist+ dist<sup>2</sup> + dist<sup>3</sup> + dist<sup>4</sup> + dir + dir<sup>2</sup> + dir<sup>3</sup> + aspect + aspect<sup>2</sup> + aspect<sup>3</sup></i>                                                         | <b>9609.2</b>  | <b>15.8</b> | <b>0.14</b> | <b>0.38</b> | <b>0.30</b> | <b>471.6</b>  | <b>0.00008</b> | <b>0.00036</b> | <b>0.8</b>  |
|             | dir + dir <sup>2</sup> + dir <sup>3</sup> + aspect + aspect <sup>2</sup> + aspect <sup>3</sup> + slope + slope <sup>2</sup> + bsm + bsm <sup>2</sup> + bsm <sup>3</sup>                                                  | 9949.5         | 13.1        | 0.15        | 0.38        | 0.30        | 394.5         | 0.00006        | 0.00038        | 0.9         |
| 2006 - 2008 | dist+ dist <sup>2</sup> + dist <sup>3</sup> + dist <sup>4</sup> + bsm + bsm <sup>2</sup> + bsm <sup>3</sup> + bsm <sup>4</sup>                                                                                           | 15692.1        | 43.2        | 0.25        | 0.50        | 0.38        | 285.4         | -0.0001        | -0.0003        | 0.6         |
|             | dist+ dist <sup>2</sup> + dist <sup>3</sup> + dist <sup>4</sup> + dir + dir <sup>2</sup> + dir <sup>3</sup> + dir <sup>4</sup> + bsm + bsm <sup>2</sup> + bsm <sup>3</sup> + bsm <sup>4</sup>                            | 15282.6        | 45.4        | 0.24        | 0.49        | 0.38        | 286.2         | -0.0002        | -0.0005        | 0.5         |
|             | dist+ dist <sup>2</sup> + dist <sup>3</sup> + dist <sup>4</sup> + bsm + bsm <sup>2</sup> + bsm <sup>3</sup> + bsm <sup>4</sup> + Ivan                                                                                    | 15680.8        | 43.3        | 0.25        | 0.50        | 0.38        | 286.8         | -0.0001        | -0.0002        | 0.6         |
|             | <i>dist+ dist<sup>2</sup> + dist<sup>3</sup> + dist<sup>4</sup> + dir + dir<sup>2</sup> + dir<sup>3</sup> + dir<sup>4</sup> + bsm + bsm<sup>2</sup> + bsm<sup>3</sup> + bsm<sup>4</sup> + Ivan</i>                       | <b>15265.0</b> | <b>45.5</b> | <b>0.24</b> | <b>0.49</b> | <b>0.38</b> | <b>287.6</b>  | <b>-0.0002</b> | <b>-0.0004</b> | <b>0.5</b>  |
|             | dist+ dist <sup>2</sup> + dist <sup>3</sup> + dist <sup>4</sup> + bsm + bsm <sup>2</sup> + bsm <sup>3</sup> + bsm <sup>4</sup> + Dean + Dean <sup>2</sup>                                                                | 15691.4        | 43.3        | 0.25        | 0.50        | 0.38        | 286.0         | -0.0002        | -0.0006        | 0.6         |
|             | dist+ dist <sup>2</sup> + dist <sup>3</sup> + dist <sup>4</sup> + dir + dir <sup>2</sup> + dir <sup>3</sup> + dir <sup>4</sup> + bsm + bsm <sup>2</sup> + bsm <sup>3</sup> + bsm <sup>4</sup> + Dean + Dean <sup>2</sup> | 15283.0        | 45.4        | 0.24        | 0.49        | 0.38        | 286.4         | -0.0002        | -0.0005        | 0.5         |
|             | dist+ dist <sup>2</sup> + dist <sup>3</sup> + dist <sup>4</sup> + slope + bsm + bsm <sup>2</sup> + bsm <sup>3</sup> + bsm <sup>4</sup> + Dean + Dean <sup>2</sup>                                                        | 15696.7        | 43.3        | 0.25        | 0.50        | 0.38        | 286.3         | -0.0002        | -0.0009        | 0.6         |

|             |                                                                                                                                                                                                                                |                |             |             |             |             |               |                            |               |             |
|-------------|--------------------------------------------------------------------------------------------------------------------------------------------------------------------------------------------------------------------------------|----------------|-------------|-------------|-------------|-------------|---------------|----------------------------|---------------|-------------|
|             | dist+ dist <sup>2</sup> + dist <sup>3</sup> + dist <sup>4</sup> + dir + dir <sup>2</sup> + dir <sup>3</sup> + dir <sup>4</sup> + bsm + bsm <sup>2</sup> + bsm <sup>3</sup> + bsm <sup>4</sup> + Avg                            | 15278.0        | 45.3        | 0.24        | 0.49        | 0.38        | 288.5         | 0.0001                     | 0.0009        | 0.5         |
| 2008 - 2010 | dist+ dist <sup>2</sup> + dist <sup>3</sup> + dir + dir <sup>2</sup> + dir <sup>3</sup> + dir <sup>4</sup>                                                                                                                     | 17588.3        | 35.7        | 0.28        | 0.53        | 0.40        | 350.8         | 0                          | -0.97         | 0.6         |
|             | dist+ dist <sup>2</sup> + dist <sup>3</sup> + dir + dir <sup>2</sup> + dir <sup>3</sup> + dir <sup>4</sup> + aspect + aspect <sup>2</sup> + aspect <sup>3</sup>                                                                | 17504.5        | 35.8        | 0.28        | 0.53        | 0.41        | 301.7         | -0.0005                    | -1.57         | 0.6         |
|             | <b>dist+ dist<sup>2</sup> + dist<sup>3</sup> + dir + dir<sup>2</sup> + dir<sup>3</sup> + dir<sup>4</sup> + bsm + bsm<sup>2</sup> + bsm<sup>3</sup> + bsm<sup>4</sup></b>                                                       | <b>17492.9</b> | <b>36.2</b> | <b>0.28</b> | <b>0.53</b> | <b>0.40</b> | <b>380.3</b>  | <b>-</b><br><b>0.00002</b> | <b>-0.98</b>  | <b>0.6</b>  |
|             | dist+ dist <sup>2</sup> + dist <sup>3</sup> + aspect + aspect <sup>2</sup> + aspect <sup>3</sup> + bsm + bsm <sup>2</sup> + bsm <sup>3</sup> + bsm <sup>4</sup>                                                                | 18367.6        | 31.1        | 0.30        | 0.55        | 0.42        | 346.7         | 0.00004                    | -1.04         | 0.7         |
|             | dist+ dist <sup>2</sup> + dist <sup>3</sup> + dir + dir <sup>2</sup> + dir <sup>3</sup> + dir <sup>4</sup> + aspect + aspect <sup>2</sup> + aspect <sup>3</sup> + bsm + bsm <sup>2</sup> + bsm <sup>3</sup> + bsm <sup>4</sup> | 17475.0        | 36.4        | 0.28        | 0.53        | 0.40        | 377.0         | -                          | -1.00         | 0.6         |
| 2010 - 2013 | dist+ dist <sup>2</sup> + dist <sup>3</sup> + dist <sup>4</sup> + dir + dir <sup>2</sup> + dir <sup>3</sup> + dir <sup>4</sup>                                                                                                 | 14272.7        | 36.9        | 0.21        | 0.46        | 0.35        | 206.64        | -                          | 0.0022        | 0.63        |
|             |                                                                                                                                                                                                                                |                |             |             |             |             |               | 0.00006                    |               |             |
|             | dist+ dist <sup>2</sup> + dist <sup>3</sup> + dist <sup>4</sup> + dir + dir <sup>2</sup> + dir <sup>3</sup> + dir <sup>4</sup> + slope + slope <sup>2</sup>                                                                    | 14260.5        | 37.0        | 0.21        | 0.46        | 0.35        | 206.10        | -                          | 0.0020        | 0.63        |
|             |                                                                                                                                                                                                                                |                |             |             |             |             |               | 0.00010                    |               |             |
|             | dist+ dist <sup>2</sup> + dist <sup>3</sup> + dist <sup>4</sup> + dir + dir <sup>2</sup> + dir <sup>3</sup> + dir <sup>4</sup> + Ivan                                                                                          | 14255.4        | 37.0        | 0.21        | 0.46        | 0.35        | 207.80        | -                          | 0.0023        | 0.63        |
|             |                                                                                                                                                                                                                                |                |             |             |             |             |               | 0.00006                    |               |             |
| 2013 - 2015 | <b>dist+ dist<sup>2</sup> + dist<sup>3</sup> + dist<sup>4</sup> + dir + dir<sup>2</sup> + dir<sup>3</sup> + dir<sup>4</sup> + slope + slope<sup>2</sup> + bsm + bsm<sup>2</sup> + bsm<sup>3</sup> + bsm<sup>4</sup></b>        | <b>14080.4</b> | <b>38.1</b> | <b>0.20</b> | <b>0.45</b> | <b>0.34</b> | <b>203.11</b> | <b>-</b><br><b>0.00012</b> | <b>0.0019</b> | <b>0.62</b> |
|             | dist+ dist <sup>2</sup> + dist <sup>3</sup> + dist <sup>4</sup> + dir + dir <sup>2</sup> + dir <sup>3</sup> + dir <sup>4</sup> + slope + slope <sup>2</sup> + Ivan                                                             | 14243.9        | 37.1        | 0.21        | 0.46        | 0.35        | 207.34        | -                          | 0.0020        | 0.63        |
|             |                                                                                                                                                                                                                                |                |             |             |             |             |               | 0.00010                    |               |             |
|             | dist+ dist <sup>2</sup> + dist <sup>3</sup> + dist <sup>4</sup> + dir + dir <sup>2</sup> + dir <sup>3</sup> + dir <sup>4</sup> + Avg                                                                                           | 14312.2        | 36.9        | 0.21        | 0.45        | 0.35        | 205.61        | -                          | -0.0154       | 0.63        |
|             |                                                                                                                                                                                                                                |                |             |             |             |             |               | 0.00353                    |               |             |
| 2013 - 2015 | dist+ dist <sup>2</sup> + dist <sup>3</sup> + dist <sup>4</sup> + dir + dir <sup>2</sup> + dir <sup>3</sup> + dir <sup>4</sup>                                                                                                 | 38383.7        | 9.6         | 1.75        | 1.32        | 1.01        | 270.9         | 0                          | 0.036         | 0.91        |
|             | <b>dir + dir<sup>2</sup> + dir<sup>3</sup> + dir<sup>4</sup> + bsm + bsm<sup>2</sup> + bsm<sup>3</sup> + bsm<sup>4</sup></b>                                                                                                   | <b>37814.9</b> | <b>14.0</b> | <b>1.65</b> | <b>1.28</b> | <b>0.98</b> | <b>256.9</b>  | <b>0.009</b>               | <b>0.090</b>  | <b>0.86</b> |
|             | dist+ dist <sup>2</sup> + dist <sup>3</sup> + dist <sup>4</sup> + dir + dir <sup>2</sup> + dir <sup>3</sup> + dir <sup>4</sup> + aspect                                                                                        | 38366.5        | 9.7         | 1.75        | 1.32        | 1.01        | 269.7         | 0.00004                    | 0.036         | 0.90        |
|             | dist+ dist <sup>2</sup> + dist <sup>3</sup> + dist <sup>4</sup> + dir + dir <sup>2</sup> + dir <sup>3</sup> + dir <sup>4</sup> + aspect + Dean                                                                                 | 38383.7        | 9.7         | 1.73        | 1.32        | 1.01        | 247.1         | 0.009                      | 0.094         | 0.90        |
|             | dist+ dist <sup>2</sup> + dist <sup>3</sup> + dist <sup>4</sup> + dir + dir <sup>2</sup> + dir <sup>3</sup> + dir <sup>4</sup> + Avg                                                                                           | 38373.1        | 9.6         | 1.75        | 1.32        | 1.01        | 267.6         | 0.00002                    | 0.035         | 0.91        |
|             | dist+ dist <sup>2</sup> + dist <sup>3</sup> + dist <sup>4</sup> + dir + dir <sup>2</sup> + dir <sup>3</sup> + dir <sup>4</sup> + slope + Avg                                                                                   | 38371.0        | 9.7         | 1.75        | 1.32        | 1.01        | 265.3         | 0.00016                    | 0.036         | 0.90        |



|                |                                                                                                                                                                                                                                                                                                                              |                |             |             |             |             |               |                      |                 |             |
|----------------|------------------------------------------------------------------------------------------------------------------------------------------------------------------------------------------------------------------------------------------------------------------------------------------------------------------------------|----------------|-------------|-------------|-------------|-------------|---------------|----------------------|-----------------|-------------|
| 2015 -<br>2016 | dist+ dist <sup>2</sup> + dist <sup>3</sup> + dist <sup>4</sup> + bsm + bsm <sup>2</sup> + bsm <sup>3</sup>                                                                                                                                                                                                                  | 30904.9        | 52.0        | 0.73        | 0.86        | 0.66        | 316.4         | 0.0001               | 0.0004          | 0.48        |
|                | <b>dist+ dist<sup>2</sup> + dist<sup>3</sup> + dist<sup>4</sup> + dir + dir<sup>2</sup> + dir<sup>3</sup> + dir<sup>4</sup> + bsm + bsm<sup>2</sup> + bsm<sup>3</sup></b>                                                                                                                                                    | <b>27722.6</b> | <b>54.6</b> | <b>0.69</b> | <b>0.83</b> | <b>0.64</b> | <b>304.7</b>  | <b>-0.0007</b>       | <b>0.0013</b>   | <b>0.45</b> |
|                | dist+ dist <sup>2</sup> + dist <sup>3</sup> + dist <sup>4</sup> + aspect + aspect <sup>2</sup> + aspect <sup>3</sup> + bsm + bsm <sup>2</sup> + bsm <sup>3</sup>                                                                                                                                                             | 28304.1        | 52.1        | 0.73        | 0.86        | 0.66        | 318.5         | 0.0001               | 0.0004          | 0.48        |
|                | dist+ dist <sup>2</sup> + dist <sup>3</sup> + dist <sup>4</sup> + slope + slope <sup>2</sup> + slope <sup>3</sup> + bsm + bsm <sup>2</sup> + bsm <sup>3</sup>                                                                                                                                                                | 28300.3        | 52.1        | 0.73        | 0.86        | 0.66        | 320.3         | -0.0001              | 0.0006          | 0.48        |
|                | dist+ dist <sup>2</sup> + dist <sup>3</sup> + dist <sup>4</sup> + aspect + aspect <sup>2</sup> + aspect <sup>3</sup> + slope + slope <sup>2</sup> + slope <sup>3</sup> + bsm + bsm <sup>2</sup> + bsm <sup>3</sup>                                                                                                           | 28273.1        | 52.3        | 0.73        | 0.85        | 0.66        | 322.3         | -0.0001              | 0.0006          | 0.48        |
| 2016 -<br>2017 | dist+ dist <sup>2</sup> + dist <sup>3</sup> + dir + dir <sup>2</sup> + dir <sup>3</sup>                                                                                                                                                                                                                                      | 31930.9        | 21.2        | 1.01        | 1.00        | 0.78        | 1681.7        | 0.0005               | 0.08            | 0.79        |
|                | dist+ dist <sup>2</sup> + dist <sup>3</sup> + dir + dir <sup>2</sup> + dir <sup>3</sup> + aspect + aspect <sup>2</sup>                                                                                                                                                                                                       | 23902.6        | 21.7        | 0.99        | 1.00        | 0.77        | 1501.3        | 0.0109               | -0.03           | 0.79        |
|                | <b>dist+ dist<sup>2</sup> + dist<sup>3</sup> + dir + dir<sup>2</sup> + dir<sup>3</sup> + slope + slope<sup>2</sup></b>                                                                                                                                                                                                       | <b>23892.4</b> | <b>21.8</b> | <b>0.99</b> | <b>0.99</b> | <b>0.77</b> | <b>1729.7</b> | <b>0.0105</b>        | <b>-0.02</b>    | <b>0.78</b> |
|                | dist+ dist <sup>2</sup> + dist <sup>3</sup> + dir + dir <sup>2</sup> + dir <sup>3</sup> + aspect + aspect <sup>2</sup> + aspect <sup>3</sup> + slope + slope <sup>2</sup>                                                                                                                                                    | 31748.4        | 22.3        | 1.00        | 1.00        | 0.78        | 1275.2        | 0.0004               | 0.08            | 0.78        |
|                | dist+ dist <sup>2</sup> + dist <sup>3</sup> + aspect + aspect <sup>2</sup> + aspect <sup>3</sup> + slope + slope <sup>2</sup> + bsm + bsm <sup>2</sup> + bsm <sup>3</sup>                                                                                                                                                    | 32947.4        | 13.5        | 1.11        | 1.05        | 0.83        | 2649.8        | 0.0003               | 0.09            | 0.87        |
| 2017 -<br>2019 | dist+ dist <sup>2</sup> + dist <sup>3</sup> + dist <sup>4</sup> + dir + dir <sup>2</sup> + dir <sup>3</sup> + dir <sup>4</sup> + bsm + bsm <sup>2</sup> + bsm <sup>3</sup>                                                                                                                                                   | 13069.5        | 28.8        | 0.19        | 0.43        | 0.31        | 551.2         | -<br>0.00010         | 0.0007          | 0.71        |
|                | <b>dist+ dist<sup>2</sup> + dist<sup>3</sup> + dist<sup>4</sup> + dir + dir<sup>2</sup> + dir<sup>3</sup> + dir<sup>4</sup> + aspect + aspect<sup>2</sup> + aspect<sup>3</sup> + aspect<sup>4</sup> + bsm + bsm<sup>2</sup> + bsm<sup>3</sup></b>                                                                            | <b>13068.3</b> | <b>28.8</b> | <b>0.19</b> | <b>0.43</b> | <b>0.31</b> | <b>547.5</b>  | <b>-<br/>0.00008</b> | <b>0.0008</b>   | <b>0.72</b> |
|                | <b>dist+ dist<sup>2</sup> + dist<sup>3</sup> + dist<sup>4</sup> + dir + dir<sup>2</sup> + dir<sup>3</sup> + dir<sup>4</sup> + slope + slope<sup>2</sup> + slope<sup>3</sup> + slope<sup>4</sup> + bsm + bsm<sup>2</sup> + bsm<sup>3</sup></b>                                                                                | <b>13059.3</b> | <b>28.9</b> | <b>0.19</b> | <b>0.43</b> | <b>0.31</b> | <b>553.0</b>  | <b>0.00004</b>       | <b>0.0013</b>   | <b>0.71</b> |
|                | dist+ dist <sup>2</sup> + dist <sup>3</sup> + dist <sup>4</sup> + dir + dir <sup>2</sup> + dir <sup>3</sup> + dir <sup>4</sup> + aspect + aspect <sup>2</sup> + aspect <sup>3</sup> + aspect <sup>4</sup> + slope + slope <sup>2</sup> + slope <sup>3</sup> + slope <sup>4</sup> + bsm + bsm <sup>2</sup> + bsm <sup>3</sup> | 13058.7        | 28.9        | 0.19        | 0.43        | 0.31        | 549.5         | 0.00008              | 0.0014          | 0.71        |
|                | dist+ dist <sup>2</sup> + dist <sup>3</sup> + dist <sup>4</sup> + dir + dir <sup>2</sup> + dir <sup>3</sup> + dir <sup>4</sup> + aspect + aspect <sup>2</sup> + aspect <sup>3</sup> + aspect <sup>4</sup> + slope + slope <sup>2</sup> + slope <sup>3</sup> + slope <sup>4</sup>                                             | 14420.3        | 19.8        | 0.21        | 0.46        | 0.33        | 520.0         | 0.00002              | 0.0017          | 0.81        |
|                |                                                                                                                                                                                                                                                                                                                              |                |             |             |             |             |               |                      |                 |             |
| 2019 -<br>2020 | <b>dist+ dist<sup>2</sup> + dist<sup>3</sup> + dist<sup>4</sup> + dir + dir<sup>2</sup> + dir<sup>3</sup> + dir<sup>4</sup></b>                                                                                                                                                                                              | <b>20352.5</b> | <b>36.4</b> | <b>0.36</b> | <b>0.60</b> | <b>0.45</b> | <b>276.2</b>  | <b>0.00012</b>       | <b>-0.00080</b> | <b>0.64</b> |

|                |                                                                                                                                                                                                                                                            |                |             |             |             |             |              |                |               |             |
|----------------|------------------------------------------------------------------------------------------------------------------------------------------------------------------------------------------------------------------------------------------------------------|----------------|-------------|-------------|-------------|-------------|--------------|----------------|---------------|-------------|
|                | $\text{dir} + \text{dir}^2 + \text{dir}^3 + \text{dir}^4 + \text{bsm} + \text{bsm}^2 + \text{bsm}^3$                                                                                                                                                       | 21429.6        | 30.0        | 0.39        | 0.63        | 0.48        | 322.3        | 0.00006        | -0.00038      | 0.70        |
|                | $\text{dir} + \text{dir}^2 + \text{dir}^3 + \text{dir}^4 + \text{slope} + \text{slope}^2 + \text{slope}^3$                                                                                                                                                 | 21748.3        | 28.0        | 0.41        | 0.64        | 0.49        | 315.5        | 0              | 0             | 0.72        |
|                | $\text{dir} + \text{dir}^2 + \text{dir}^3 + \text{dir}^4 + \text{slope} + \text{slope}^2 + \text{slope}^3 + \text{bsm} + \text{bsm}^2 + \text{bsm}^3$                                                                                                      | 21353.2        | 30.5        | 0.39        | 0.63        | 0.48        | 320.6        | 0.00002        | 0.00002       | 0.70        |
|                | $\text{dist} + \text{dist}^2 + \text{dist}^3 + \text{dist}^4 + \text{aspect} + \text{aspect}^2 + \text{aspect}^3 + \text{slope} + \text{slope}^2 + \text{slope}^3 + \text{bsm} + \text{bsm}^2 + \text{bsm}^3$                                              | 21817.4        | 27.6        | 0.41        | 0.64        | 0.48        | 270.8        | 0.00016        | -0.00050      | 0.73        |
| 2020 -<br>2021 | $\text{dist} + \text{dist}^2 + \text{dist}^3 + \text{dist}^4 + \text{dir} + \text{dir}^2 + \text{dir}^3$                                                                                                                                                   |                |             |             |             |             |              |                |               |             |
|                |                                                                                                                                                                                                                                                            | 21061.7        | 37.3        | 0.38        | 0.62        | 0.46        | 740.9        | 0.00008        | 0.0038        | 0.63        |
|                | $\text{dist} + \text{dist}^2 + \text{dist}^3 + \text{bsm} + \text{bsm}^2 + \text{bsm}^3 + \text{bsm}^4$                                                                                                                                                    | 21946.6        | 32.2        | 0.41        | 0.64        | 0.48        | 888.0        | 0.00014        | 0.0044        | 0.68        |
|                | $\text{dist} + \text{dist}^2 + \text{dist}^3 + \text{dist}^4 + \text{dir} + \text{dir}^2 + \text{dir}^3 + \text{bsm} + \text{bsm}^2 + \text{bsm}^3 + \text{bsm}^4$                                                                                         | 20473.5        | 41.1        | 0.36        | 0.60        | 0.45        | 778.0        | 0.00012        | 0.0033        | 0.59        |
|                | $\text{dist} + \text{dist}^2 + \text{dist}^3 + \text{aspect} + \text{aspect}^2 + \text{aspect}^3 + \text{aspect}^4 + \text{bsm} + \text{bsm}^2 + \text{bsm}^3 + \text{bsm}^4$                                                                              | 21945.2        | 32.3        | 0.41        | 0.64        | 0.48        | 900.9        | 0.00016        | 0.0042        | 0.68        |
|                | <b><math>\text{dist} + \text{dist}^2 + \text{dist}^3 + \text{dist}^4 + \text{dir} + \text{dir}^2 + \text{dir}^3 + \text{aspect} + \text{aspect}^2 + \text{aspect}^3 + \text{aspect}^4 + \text{bsm} + \text{bsm}^2 + \text{bsm}^3 + \text{bsm}^4</math></b> | <b>20362.5</b> | <b>41.2</b> | <b>0.36</b> | <b>0.60</b> | <b>0.45</b> | <b>783.0</b> | <b>0.00010</b> | <b>0.0033</b> | <b>0.59</b> |

dir = direction from river mouth; dis = distance from river mouth; bsm = bathymetric surface model (depth); Gilbert = exposure vulnerability (EV) for Hurricane Gilbert; Ivan = EV for Hurricane Ivan; Dean = EV for Hurricane Dean; Avg. = average EV for Ivan and Dean.

1. Luke, D.; McLaren, K.; Wilson, B. Modeling hurricane exposure in a Caribbean lower montane tropical wet forest: The effects of frequent, intermediate disturbances and topography on forest structural dynamics and composition. *Ecosystems* **2016**, *19*, 1178-1195.
2. McLaren, K.; Luke, D.; Tanner, E.; Bellingham, P.J.; Healey, J.R. Reconstructing the effects of hurricanes over 155 years on the structure and diversity of trees in two tropical montane rainforests in Jamaica. *Agricultural and Forest Meteorology* **2019**, *276*, 107621.
3. Knapp, K.R.; Kruk, M.C.; Levinson, D.H.; Diamond, H.J.; Neumann, C.J. The international best track archive for climate stewardship (IBTrACS) unifying tropical cyclone data. *Bulletin of the American Meteorological Society* **2010**, *91*, 363-376.
4. Knapp, K.R., H. J. Diamond, J. P. Kossin, M. C. Kruk, C. J. Schreck. International Best Track Archive for Climate Stewardship (IBTrACS) Project, Version 4. North Atlantic. NOAA National Centers for Environmental Information. **2018**, doi:10.25921/82ty-9e16.
5. Mikita, T.; Klimánek, M. Topographic exposure and its practical applications. *Journal of Landscape Ecology* **2010**, *3*, 42-51.
6. Batke, S.P.; Jocque, M.; Kelly, D.L. Modelling hurricane exposure and wind speed on a mesoclimate scale: a case study from Cusuco NP, Honduras. *PloS one* **2014**, *9*, e91306.
